1 **The ultra-sensitive Nodewalk technique identifies stochastic from virtual,**  
2 **population-based enhancer hubs regulating MYC in 3D: Implications for the**  
3 **fitness of cancer cells**

4  
5  
6  
7 Noriyuki Sumida (1)\*, Emmanouil G Sifakis (1)#, Barbara A Scholz (1)#, Alejandro Fernandez-  
8 Woodbridge (1)#, Narsis A Kiani (2), David Gomez-Cabrero (2, 3), J Peter Svensson (4), Jesper Tegner  
9 (2, 5, 6), Anita Göndör (1)# and Rolf Ohlsson (1)#\*

10  
11  
12  
13 (1) Department of Oncology and Pathology, Karolinska Institutet, Karolinska University Hospital,  
14 Z1:00, SE-171 76 Stockholm, Sweden

15  
16 (2) Unit of Computational Medicine, Department of Medicine, Center for Molecular Medicine,  
17 Karolinska Institutet, Karolinska University Hospital, L8:05, SE-171 76, Stockholm, Sweden

18  
19 (3) Mucosal and Salivary Biology Division, King's College London Dental Institute, London, SE1 9RT,  
20 United Kingdom

21  
22 (4) Department of Biosciences and Nutrition, Novum, Karolinska Institutet, S-141 83 Huddinge,  
23 Sweden

24  
25 (5) Science for Life Laboratory, Tomtebodavägen 23A, SE-17165, Solna, Sweden

26  
27 (6) Biological and Environmental Sciences and Engineering Division, Computer, Electrical and  
28 Mathematical Sciences and Engineering Division, King Abdullah University of Science and Technology  
29 (KAUST), Thuwal 23955–6900, Saudi Arabia

30  
31  
32 # Present address: Bio Systems Design Department, Bio Analytical Systems Product Division, Science &  
33 Medical Systems Business Group, Hitachi High Technologies, Ichige 882, Hitachinaka, Ibaraki, 312-  
34 8504, Japan

35  
36  
37  
38 \* Corresponding authors ([Noriyuki.Sumida@ki.se](mailto:Noriyuki.Sumida@ki.se), [Rolf.Ohlsson@ki.se](mailto:Rolf.Ohlsson@ki.se))  
39  
40  
41  
42

43 **Abstract**

44

45 The relationship between stochastic transcriptional bursts and dynamic 3D chromatin states is not  
46 well understood due to poor sensitivity and/or resolution of current chromatin structure-based  
47 assays. Consequently, it is not well established if enhancers operate individually and/or in clusters to  
48 coordinate gene transcription. In the current study, we introduce Nodewalk, which uniquely  
49 combines high sensitivity with high resolution to enable the analysis of chromatin networks in  
50 minute input material. The >10,000-fold increase in sensitivity over other many-to-all competing  
51 methods uncovered that active chromatin hubs identified in large input material, corresponding to  
52 10 000 cells, flanking the *MYC* locus are primarily virtual. Thus, the close agreement between  
53 chromatin interactomes generated from aliquots corresponding to less than 10 cells with randomly  
54 re-sampled interactomes, we find that numerous distal enhancers positioned within flanking  
55 topologically associating domains (TADs) converge on *MYC* in largely mutually exclusive manners.  
56 Moreover, when comparing with several enhancer baits, the assignment of the *MYC* locus as the  
57 node with the highest dynamic importance index, indicates that it is *MYC* targeting its enhancers,  
58 rather than *vice versa*. Dynamic changes in the configuration of the boundary between TADs flanking  
59 *MYC* underlie numerous stochastic encounters with a diverse set of enhancers to depict the plasticity  
60 of its transcriptional regulation. Such an arrangement might increase the fitness of the cancer cell by  
61 increasing the probability of *MYC* transcription in response to a wide range of environmental cues  
62 encountered by the cell during the neoplastic process.

63

64

65

66 **Key words: Chromatin/transcription/networks/Topology**

67

68

69

## 70 Introduction

71

72 Single cell studies have shown that transcriptional activation occurs in bursts in both prokaryotes and  
73 eukaryotes(Sanchez and Golding 2013). The resulting variability in expression levels contributes to  
74 transcriptional “noise”, and likely depends on the probability of key limiting events, such as the  
75 accessibility to transcription factors and their on-off rates at *cis*-regulatory elements (Hager et al.  
76 2009). *Cis*-regulatory elements, such as enhancers, are often positioned distal to the promoters they  
77 regulate - providing yet another level of transcriptional control by 3D chromatin conformation that  
78 influences the probability of communication between enhancers and promoters (Fullwood et al.  
79 2009). The arrangement of large domains with enhancing activities, the so-called super-enhancers  
80 has been proposed to reduce transcriptional noise and buffer against environmental perturbations in  
81 order to robustly maintain the differentiated phenotype (Hnisz et al. 2013; Hay et al. 2016). Super-  
82 enhancers can also be activated to drive unscheduled expression of oncogenes, such as *MYC*, and  
83 thus the neoplastic process (Hnisz et al. 2013; Loven et al. 2013).

84

85 When analyzing the interactomes impinging on enhancers in general and super-enhancers in  
86 particular, a common theme is that these interact with each other extensively and that such  
87 enhancer hubs collaborate to boost the transcriptional process (Patrinos et al. 2004; Gavrillov and  
88 Razin 2008; Berlivet et al. 2013; Kieffer-Kwon et al. 2013; Downen et al. 2014; Kim et al. 2014; Liu et al.  
89 2014; Markenscoff-Papadimitriou et al. 2014; Xiang et al. 2014; Ing-Simmons et al. 2015). However,  
90 experiments attempting to resolve such features have suffered from poor sensitivity or poor  
91 resolution of currently available techniques designed to examine higher order chromatin structures.  
92 A recurring complication of such techniques, which are all derived from the initial chromosome  
93 conformation capture (3C) technique (Dekker et al. 2002), is that they require large amounts of cells  
94 to attain resolution. Conversely, although Hi-C protocols (Lieberman-Aiden et al. 2009) have been  
95 developed to examine chromatin structure at the single cell level or in small cell populations, they  
96 either do not currently have the resolution sufficient to address enhancer-gene communications  
97 (Nagano et al. 2013; Stevens et al. 2017) and/or cannot discriminate between real and virtual  
98 networks (Nagano et al. 2013; Du et al. 2017; Stevens et al. 2017). Although we have earlier  
99 discovered that the 4C technique that we innovated (Zhao et al. 2006) has the capacity to capture  
100 multiple interactions to identify instances when several interactions occur simultaneously (Zhao et al.  
101 2006; Sandhu et al. 2009; Gondor et al. 2010; Zhao et al. 2015) to provide important information on  
102 chromatin networks using single baits, such information is rare to constitute only a few percent of  
103 reads from high throughput analyses, but also requires extensive logarithmic amplification steps. This  
104 conclusion is reinforced by our observation that the interactors organizing such networks are rarely  
105 clustered together prompting the conclusion that they arise by “dating” rather than “partying”  
106 (Sandhu et al. 2009). As there is currently no technique available to address the precise frequencies  
107 of enhancer-promoter interactions with the required sensitivity we remain ignorant of their  
108 dynamics in small cell populations.

109

110 To overcome these limitations, we introduce Nodewalk, which has both the resolution and an  
111 unrivalled sensitivity to comprehensively detect stochastic interactions and dynamic changes in  
112 chromatin configurations within and between topological-associated domains (TADs)(Dixon et al.  
113 2012) in very small cell populations. We took advantage of the unique features of Nodewalk, such as  
114 linear amplification steps, to address the mechanism of enhancer action, to address the mechanism  
115 of enhancer action, and examine whether or not simultaneous interactions between enhancers  
116 generate cooperating enhancer hubs to drive *MYC* transcription. We document here that although  
117 Nodewalk analyses identified a virtual, interconnected core enhancer interactome in relatively large  
118 cell populations (corresponding to 10,000 cells), these chromatin structures were largely, if not  
119 completely absent in input material corresponding to 21 alleles and by inference at the single cell  
120 level. We thus propose that *MYC* interacts with its distal enhancers in a largely mutually exclusive

121 manner. Moreover, the high dynamic importance index of *MYC* in comparison with its enhancers  
122 suggests that the position of *MYC* in an inter-TAD boundary region enables it to find and interact with  
123 a diverse range of distal enhancers scattered in the flanking TADs, to thereby increase the plasticity  
124 of its transcriptional regulation. We discuss how this arrangement might increase the fitness of  
125 cancer cells.

## 126 **Materials and Methods**

127

### 128 *Cell Culture*

129 HCT116 was kindly gifted from Dr. B. Vogelstein and maintained in McCoy's 5A modified medium  
130 (Thermo Fisher Scientific, Waltham, MA. 16600-082) supplemented with 10 % Fetal Bovine Serum  
131 (Thermo Fisher Scientific, 10270), penicillin and streptomycin (Thermo Fisher Scientific, 15140122).  
132 STR profile was confirmed at Cell Line Authentication Service (LGC standards, Cumberland Foreside,  
133 ME) with 77 % match with reference profile. Normal colon cell (HCEC) was obtained from ScienCell,  
134 Carlsbad, CA (HCoEpiC, 2950) and maintained in Colonic Epithelial Cell Medium (ScienCell, sc2951).  
135 Both cells were cultured under 5 % CO<sub>2</sub> circumstance. Drosophila S2 cells were obtained from  
136 Thermo Fisher Scientific (R69007) and maintained in Schneider's Drosophila medium (Thermo Fisher  
137 Scientific, 21720024) at the ambient temperature. Cells were routinely screened for mycoplasma  
138 contamination using EZ-PCR Mycoplasma Test Kit (Biological Industries, Cromwell, CT. 20-700-20).

139

### 140 *Library preparations of Chromosome Conformation Captured DNA*

141 Chromosome Conformation Capture (3C) was performed as described before (Naumova et al. 2012).  
142 Briefly, ten million cells were fixed with 1 % monomeric formaldehyde and the excess amount of the  
143 formaldehyde was captured by 0.125 M Glycine. Cells were aliquoted every 1 million and stored at -  
144 80 °C until use. As an external ligation control, equal amount of chromatin from Drosophila S2 cells  
145 was fixed in the same way and mixed prior to nuclear isolation. The cells were subsequently collected  
146 and suspended in 10 ml of nuclear isolation buffer (0.2 % NP-40, 10 mM Tris-HCl, pH 7.5, 10 mM  
147 NaCl, 1x Proteinase inhibitor (Roche, Basel, Switzerland. 04693116001) and incubated for 10 min on  
148 ice. Isolated nuclei were precipitated and washed with 1 ml of Buffer 2 (New England Biolabs,  
149 Ipswich, MA. B7002S). Next, nuclei were re-suspended in 500 µl of 1.2x buffer 2 and un-crosslinked  
150 fraction was removed by adding 5 µl of 10 % SDS and the incubation for 1 hr at 37 °C. Excess amount  
151 of SDS was captured by Triton X-100. The chromatin fiber was fragmented by the incubation at 37 °C  
152 overnight with *Hind* III (1 U/µl, New England Biolabs, R0104T). The fragmentation was stopped by the  
153 incubation at 65 °C for 20 min with 1 % SDS. 80 µl of the solution was transferred to a fresh tube and  
154 saved for checking the digestion (Additional file 1: Fig. S1A). The residual solution was transferred to  
155 a 50 ml tube containing 7 ml of ligation buffer (50 mM Tris-Cl, pH 7.5, 10 mM MgCl<sub>2</sub>, 1 % Triton X-  
156 100) and incubated for 1 hr at 37 °C followed by the addition of 70 µl of 100 mM ATP, 70 µl of 1 M  
157 DTT and 2000 U of T4 DNA ligase (New England Biolabs, M0202M). The solution was incubated at 16  
158 °C overnight followed by 1 hr at RT. For the reversal of the crosslinks, the solution was incubated  
159 with 300 µl of 5 M NaCl, 350 µl of 10 % SDS and 50 µl of 10 mg/ml Proteinase K at 65 °C for at least 4  
160 hrs. Finally, DNA was collected by conventional ethanol precipitation followed by the purification of  
161 ligated DNA with MSB Spin PCRapace (Strattec, Birkenfeld, Germany. 1020220200) and Zymo Clean &  
162 Concentrator-5 (Zymo Research, Irvine, CA. D4013). The quality of 3C DNA was visualized on 1 %  
163 agarose gel (Additional file 1: Fig. S1A,B) (Naumova et al. 2012).

164

### 165 *Adaptation of 3C protocol for low cell input*

166 The 3C libraries were prepared as above with following modifications (see Additional file 1: Fig. S3 for  
167 additional information): Following formaldehyde fixation, HCT116 and S2 cells were counted and  
168 diluted in nuclear isolation buffer to make 600 cells/µl (corresponding to ~3 ng of genomic DNA/µl).  
169 Aliquots (0.5 µl) of the resulting cell suspension was mixed and incubated on ice for 10 min. The cell  
170 suspension was directly diluted 10 times with x 1.2 Buffer 2 (see above). Next, the samples were  
171 digested with *Hind* III and ligated as above, albeit in a smaller reaction volume (20 µl for *Hind* III

172 digestion; 200  $\mu$ l for 3C ligation). Following reversal of the crosslink, the 3C-DNA was purified using  
173 the ChIP DNA Clean and Concentrator kit (Zymo Research, D5205). The elution buffer was pre-heated  
174 at 65 °C to increase the recovery of large DNA fragments.

#### 175 176 *Measurement of restriction digestion efficiency*

177 The digestion efficiency was estimated by qPCR (Additional file 3: Table 2) (Gondor et al. 2008). To  
178 evaluate the digestion efficiency of crosslinked chromatin we designed F1/R1 and F2/R2 flanking the  
179 *Hind* III sites at the 5' and 3' ends of the *MYC* promoter and gene body. The amount of total DNA was  
180 quantified with the primers F3/R3 used to produce a PCR fragment lacking an internal *Hind* III site.  
181 The linear range of amplification was determined by serial dilution of sonicated genomic DNA. The  
182 digestion efficiency was calculated as  $(1 - (\text{PCR}_{\text{F1+R1/F2+R2}}/\text{PCR}_{\text{F3+R3}})) \times 100$  (%).

#### 183 184 *3C-qPCR*

185 To quantify the frequency of 3C ligation, we first generated control 3C products. Briefly, naked  
186 genome DNAs were isolated from either HCEC or HCT116 using Mammalian Genomic DNA Extraction  
187 Kit (Sigma Aldrich, St Louis, MD. G1N10). Then genomic regions containing the annealing site of 3C  
188 primers and neighboring *Hind* III site were amplified by PCR. Each amplicon was digested with *Hind*  
189 III, pooled into one tube and ligated. Next, chimeric DNA of bait and each interactor were amplified  
190 by 3C primers (Additional file 3: Table S2). The correct amplicons were recovered from agarose gels  
191 and quantified by Nanodrop ND1000 (Thermo Fisher Scientific). The linearity and the sensitivity of 3C  
192 qPCR was confirmed using the serial dilution of the control 3C products mixed with sonicated  
193 genome DNA (200 ng per reaction). QPCRs were performed using 200 ng of 3C library by referring  
194 the same dilution of control 3C products.

#### 195 196 *Nodewalk analyses*

197 3C library was tagged using either Nextera DNA sample prep kit for routine or Nextera XT DNA  
198 sample prep kit for the analyses with lower input (Illumina, San Diego, CA. FC-121-1031, FC-131-  
199 1024). Amount of the input was validated by qPCR (Additional file 3: Table S2). Primer 1a and 1b (Fig.  
200 1A and Additional file 5: Table S4) were incorporated by limited cycle PCR following the  
201 manufacturer's instruction with replacing Nextera primers with 22 pmol each of Primer 1a and 1b.  
202 For Nodewalk with 34.8 pg of input, PCR cycle was increased to 17 following the previous research  
203 (Picelli et al. 2014). The library was amplified by *in vitro* transcription using Maxiscript T7 kit (Thermo  
204 Fisher Scientific, AM1312M). The template DNA was removed by Turbo DNase I (Life technology,  
205 AM2239) prior to the RNA purification step (RNeasy, Qiagen, Venlo, Netherlands. 74104). For primer  
206 annealing, 1  $\mu$ g of template RNA and 10 pmol of bait-specific primer (primer 3a, Fig. 1A) in 20  $\mu$ l of  
207 water was denatured at 75 °C for 3 min and then mixed with 25  $\mu$ l of 2x buffer of Platinum  
208 Quantitative RT-PCR ThermoScript One-Step System (Thermo Fisher Scientific, 11731-015) and 1  $\mu$ l of  
209 SUPERase In RNase inhibitor (Thermo Fisher Scientific, AM2694). The solution was incubated at 4 °C  
210 for 44-48 hrs with presence or absence of betaine (see following section). Following the incubation at  
211 65 °C for 5 min, the primer was extended by adding 1  $\mu$ l of ThermoScript Plus/Platinum Taq mix at 60  
212 °C for 30 min. The enzyme was inactivated by incubation at 95 °C for 5 min, and then the bait-  
213 interactor chimeric DNA was enriched by amplification with 1  $\mu$ l of Illumina N5 primer from Nextera  
214 DNA sample prep kit using the following PCR cycle: 36 cycles of 95 °C for 10 sec, 63 °C for 30 sec and  
215 72 °C for 30 sec followed by final extension at 72 °C for 3 min. The resulting library DNAs were  
216 purified by same volume of Agencourt Ampure XP (Beckman Coulter, Brea, CA. A63880). To  
217 extrapolate the specifically primed 3C cDNA, one tenth of the libraries were digested with *Hind*III for  
218 1 hr at 37 °C and subjected on High Sensitivity DNA Analysis Kit (Agilent technologies, Santa Clara,  
219 CA. 5067-4626) with Bioanalyzer 2100. Only the library that showed the single band corresponds to  
220 the enriched bait sequence was used for the high throughput sequencing (Fig. 1D). Finally, Illumina  
221 P7 sequence was incorporated by 5 cycles of PCR with Primers 3a and 3b and the resulting Nodewalk  
222 libraries were purified by using the same volume of Agencourt Ampure XP. Maximum 10 libraries

223 were pooled and sequenced on Illumina Miseq (Illumina) using Miseq reagent cartridge v2 (Illumina)  
224 that generated 140-150 bp paired-end reads.

225

#### 226 *Sampling of low input control*

227 For Nodewalk analysis of 10 aliquots of 0.88 ng of 3C DNA were sampled from 3C DNA prepared from  
228 1 million cells. To assess technical variation, three aliquots of 1 µg each of 3C RNA were subjected to  
229 Nodewalk analysis. Aliquots of 34.8 pg of 3C DNA (corresponding to genomic DNA of 7 cells which  
230 contains 21 *MYC* alleles) were sampled from a diluted library of one of the 3C DNA prepared from  
231 300 cells.

232

#### 233 *Optimization of primer annealing*

234 Following the preparation of the 3C library by a conventional protocol, 3C RNA was generated by *in*  
235 *vitro* transcription (see above). The bait primers were annealed at 4°C irrespective of its estimated  
236 melting temperature with the stringency of the annealing process provided by betaine at either 0.5,  
237 1 or 1.5 M (final conc.). The betaine concentrations of each primer used here are summarized in  
238 Additional file 5: Table S4.

239

#### 240 *Sequence mapping and filtering*

241 Paired-end reads were independently mapped using bwa version 0.7.12-r1039 to a merged reference  
242 genome composed of phiX174, *Drosophila* (BDGP5.65), *Escherichia coli* K12 and human (GRCh37.75)  
243 genomes. Resulting SAM files were processed and annotated with the Nodewalk Pipeline Analysis  
244 software (Fernandez-Woodbridge and Sumida, manuscript in preparation). Briefly, alignments with  
245 mapping quality greater than 10 of the second read were used to determine probe position. An  
246 extension region (extending from the probe's end to the first restriction site) was used to  
247 discriminate valid from mis-annealing events. The total number of alignments in the first read with  
248 the proper probe extension in the second read was reported by restriction fragment.

249

#### 250 *Window summaries at Nodewalk with low input*

251 Interactors detected by Nodewalk with lower input such as 34.8 pg or 0.88 ng of 3C DNA or 177 cells  
252 aliquots were summarized in 10 kbps window. At first the reference genome was divided into 10  
253 kbps window and each interaction was binned according to the center of the interacting locus. LEs  
254 were summed when more than one interactor was overlapping with a window.

255

#### 256 *Identification of statistically significant interactions*

257 To determine the statistically significant interactions, the empirical resampling approach for  
258 determining significant enrichment described in reference (Williams et al. 2014) was adopted. In  
259 brief, the observed reads on each chromosome were randomly associated (shuffled) with a *Hind* III  
260 fragment from that chromosome. Next, a significance threshold, the minimum number of reads (X) in  
261 each *Hind* III fragment required to achieve a false discovery threshold (FDR) lower than 0.01, was  
262 calculated, i. e.:

263

$$264 \frac{\# \text{ of } \textit{HindIII} \text{ fragments with } X \text{ or more shuffled reads}}{\# \text{ of observed } \textit{HindIII} \text{ fragments with } X \text{ or more reads}} < 0.01 = FDR$$

265

266 We repeated the shuffling for 1,000 times to obtain a distribution of X at each chromosome. All of  
267 the analyses calculated a significance threshold from the top fifth percentile. Because regions around  
268 the baits are expected to have a higher background, the regions composing single peaks around the  
269 bait were omitted. The above approach was applied to all Nodewalk samples except the libraries  
270 with 21 alleles, due to small sample limitations. Finally, to avoid possible PCR biases, the number of  
271 distinct transposon integration sites was reported as output (ligation events – or LE).

272

#### 273 *Enrichment analysis of cis regulatory elements*

274 The number of interactors with each overlapping ChIP-seq peaks (Hits) was compared to a random  
 275 model through a permutation based approach by running over 1,000 random shuffles. At each  
 276 random iteration, we generated a library of interactors and counted the number of peaks  
 277 overlapping the ChIP-seq library (rHits). The random library maintained the same number of long  
 278 (defined as interactors are >5 Mbps flanking genomic distance from the bait), short (<5 Mbps), local  
 279 (<100 kbps) and *trans* interactors as the observed library. The permuted p-value is reported as the  
 280 number of times in which the rHits was higher than the observed Hits divided by the total number of  
 281 permutations. ChIP-seq peaks were integrated on the lists of the interactors using “findOverlaps”  
 282 function from “GRanges” R package with setting of maxgap = 0. Reference ChIP-seq data are listed in  
 283 Table 1.  
 284  
 285

**Table 1. External Datasets:**

| <b>Roadmap Epigenomics</b>                      |                                                                                                                                                                                         |                                                                                                                                                                                                                                                                |
|-------------------------------------------------|-----------------------------------------------------------------------------------------------------------------------------------------------------------------------------------------|----------------------------------------------------------------------------------------------------------------------------------------------------------------------------------------------------------------------------------------------------------------|
| Colonic Mucosa H3K4me1                          | GSM621670                                                                                                                                                                               | NarrowPeak for E075<br><a href="http://egg2.wustl.edu/roadmap/data/byFileType/peaks/consolidated/narrowPeak/">http://egg2.wustl.edu/roadmap/data/byFileType/peaks/consolidated/narrowPeak/</a><br>Note: Substitute for HCEC                                    |
| Colonic Mucosa H3K27ac                          | GSM1112779                                                                                                                                                                              |                                                                                                                                                                                                                                                                |
| <b>Geo Entries</b>                              |                                                                                                                                                                                         |                                                                                                                                                                                                                                                                |
| HCT116 H3K4me3                                  | GSM1240115                                                                                                                                                                              | GSE51176: HU Dataset: Mapping: mapped to HG19 with bwa 0.7.12 @ MapQ>10, Peak Calling: macs 2.0.9 (Params: -g hs -p 1e-2 -nomodel -c GSM1240117)                                                                                                               |
| HCT116 H3K4me1                                  | GSM1240111                                                                                                                                                                              |                                                                                                                                                                                                                                                                |
| HCT116 H3K27ac                                  | GSM946854                                                                                                                                                                               | GSE38477: Cell type-specific binding patterns reveal that TCF7L2 can be tethered to the genome by association with GATA3. Analysis: Mapping: mapped to HG19 with bwa 0.7.12 @ MapQ>10. Peak Calling: macs 2.0.9 (Params: -g hs -p 1e-2 -nomodel -c GSM1240117) |
| <b>ENCODE</b>                                   |                                                                                                                                                                                         |                                                                                                                                                                                                                                                                |
| HCT116 CTCF                                     | GSM1022652                                                                                                                                                                              | GSE30263: CTCF Binding Sites by ChIP-seq from ENCODE/University of Washington                                                                                                                                                                                  |
| HCT116 Rad21                                    | GSM1010848                                                                                                                                                                              | GSE32465: Transcription Factor Binding Sites by ChIP-seq from ENCODE/HAIB<br>Analysis: mapped to HG19 with bwa 0.7.12 @ MapQ>10, macs 1.4 no control                                                                                                           |
| <b>Other</b>                                    |                                                                                                                                                                                         |                                                                                                                                                                                                                                                                |
| HCT116 Super Enhancer                           | Reference(Hnisz et al. 2013): Data S1, filtered only SuperEnh = 1                                                                                                                       |                                                                                                                                                                                                                                                                |
| Colon Crypt Rep1 (HCEC stand-in) Super Enhancer | Reference(Hnisz et al. 2013): Data S1, filtered only SuperEnh = 1,<br>Note: Substitute for HCEC                                                                                         |                                                                                                                                                                                                                                                                |
| HG19 Ensemble Genes 75                          | <a href="http://feb2014.archive.ensembl.org/biomart/martview/aabe8088059e12c608bc3805af31b156">http://feb2014.archive.ensembl.org/biomart/martview/aabe8088059e12c608bc3805af31b156</a> |                                                                                                                                                                                                                                                                |
| Drosophila Genome                               | BDGP5.65                                                                                                                                                                                |                                                                                                                                                                                                                                                                |
| Phix Genome                                     | gi 9626372 ref NC_001422.1  Enterobacteria phage phiX174, complete genome                                                                                                               |                                                                                                                                                                                                                                                                |
| E. coli Genome                                  | K12                                                                                                                                                                                     |                                                                                                                                                                                                                                                                |
| Human Genome                                    | GRCh37                                                                                                                                                                                  |                                                                                                                                                                                                                                                                |

286  
 287 *Reduction of LE for the comparison of the enhancer proportion between HCEC and HCT116*  
 288 Since there are 3 MYC alleles in HCT116, we selected 2/3 of the interactions in HCT116 based on the  
 289 probability  $p_j^i = \frac{f_{ij}}{\sum_{ij=1}^n f_{ij}}$  where  $f_{ij}$  is the frequency of interaction between node i and node j  
 290 and n is number of interactions (LE). This calculation reduced the total interactors in HCT116 from  
 291 10141 to 7250.  
 292

293 *Calculation of the recovery of ligation events and quantification of the input cells*

294 The recovery of the ligation events was defined as the amount of all observed detected ligation  
295 events compared to the expected amount of all possible ligation events using the number of the de-  
296 duplicated reads (LE). For this calculation, we included LE of non-significant interactions. The sum of  
297 LE was therefore divided by the number of the possible LE estimated as follows: Using the  
298 representative amount of genomic DNA in human cells (5 pg/cell), we estimated the number of the  
299 input cell from the quantity of 3C DNA estimated by either Nanodrop (for the input of 10,000 cells) or  
300 qPCR (for the experiments with lower input, see above and Additional file 3: Table S2). As HCT116  
301 cells harbor 3 *MYC* alleles, the estimated number of alleles per cell was therefore multiplied with 3  
302 for HCT116 and 2 for HCEC. These values indicate the potential of the ligation events at the one side  
303 of the restriction site in the bait fragment, including self-ligation as well as interactions with  
304 neighboring fragments. As the overall recovery of ligation events exceeded 100 % at Nodewalk with  
305 34.8 pg input, caused by the addition of non-template base or nibbling at the 3'-end of the interactor  
306 generated by higher number of PCR cycles, LE exceeding 1 were counted as 1.

307  
308 *Mapping the interactors with increased window size.*

309 Ligation events of 9 Nodewalk libraries derived from 300 cells or 10 libraries derived from 0.88 ng of  
310 3C DNA were summed up at each window size (either 25, 50 or 100 kbps). The windows were shifted  
311 each 10 kbps and visualized on WashU Epigenome Browser (Zhou et al. 2011) (summary method:  
312 Average).

313  
314 *Comparison between expected and observed number of enhancers within the MYC interactome*

315 A permutation-based approach was adopted to test whether the observed number of enhancers  
316 impinging on *MYC* in the low cell input protocols, namely the Nodewalk with 0.88 ng and with 34.8  
317 pg inputs, significantly differs from the corresponding expected numbers. Specifically, a null  
318 distribution was formed by randomly selecting interacting regions 10,000 times from the *MYC*  
319 network with 10k cells input keeping the numbers of regions as of the corresponding observed low  
320 input interactomes. The method assigned the sampled interactors with probability weights which  
321 were based on their observed number of ligation events (LE) in the higher cell count network. In each  
322 cycle, the total number of interacting regions that overlapped with H3K27ac peaks was counted. The  
323 approach was repeated separately for each analysis.

324  
325 *RNA/DNA FISH analyses*

326 Single stranded probes were prepared to increase the efficiency of the annealing. At first double  
327 stranded DNA spanning *MYC* intron 1 (chr8:128,749,271-128,750,480) and a part of intron 2  
328 (chr8:128,751,280-128,752,201) were obtained by PCR (5' terminal of forward primer is biotinylated  
329 to capture the sense strand, see additional file 3: Table S2). DNAs were labeled with Green 496 dUTP  
330 (Enzo Life Sciences, Farmingdale, NY. ENZ-42381) for intron 1 and Chroma Tide Texas Red -12- dUTP  
331 (Thermo Fisher Scientific, C-7631) for intron 2 using Bioprime Array CGH kit (Life technologies,  
332 18095-011) and captured by Dynabeads M280 Streptavidine (Thermo Fisher Scientific, 11205D). The  
333 beads were incubated at 98 °C for 5 min and released anti-sense strand was recovered. At last single  
334 stranded DNA was purified with Zymo Clean & concentrator -5. RNA FISH analyses were performed  
335 as previously described(Zhao et al. 2015). In brief, cells cultured on chamber slides (Thermo Fisher  
336 Scientific, 154534) were crosslinked with 3 % formaldehyde and stored in 70 % Ethanol at -20 °C until  
337 use. In all steps the ribonuclease inhibitor Ribonucleoside Vanadyl Complex (NEB, S1402S) was added  
338 to the buffers. Cells were rehydrated in PBS, permeabilized with 0.5 % Triton X-100 in 2 x sodium salt  
339 citrate (SSC) for 10 min at RT. The FISH probe mixed with human Cot-1 DNA (Thermo Fisher Scientific,  
340 15279-011) was hybridized with 2 x SSC, 50 % formamide and 10 % dextran sulfate overnight at 37°C.  
341 Cells were washed twice with 2 x SSC/ 50 % formamide for 15 min at 40 °C and 2 x SSC for 15 min at  
342 40 °C and mounted with Vectashield mounting medium with 4,6-diamidino-2-phenylindole (DAPI)  
343 (Vector Labs, Burlingame, CA. H-1200). DNA FISH was performed as same as RNA FISH but with



344 denaturing the genome DNA in 2 x SSC/50 % formamide for 40 min at 80 °C prior to anneal the  
345 probes.

346

#### 347 *ChrISP analyses*

348 The ChrISP probe was prepared from a pool of 4 PCR products spanning the *MYC* promoter and its  
349 gene body (chr8:128,746,000-128,756,177), a pool of 2 PCR products spanning the part of CRC super-  
350 enhancer (E, chr8:128,216,526-128,225,855) harboring highest LE with bait 5 at HCT116 and a pool of  
351 2 PCR products spanning the negative control site (chr8:127,220,074-127,229,883) where bait 5 was  
352 not interacting with. The PCR products were sonicated and labeled with Digoxigenin-11-dUTP (Roche,  
353 11573152910) or Biotin-16-dUTP (Roche, 11093070910) using Bioprime Array CGH. Formaldehyde-  
354 fixed (1%) cells were hybridized with ChrISP probes as described in RNA/DNA FISH protocol. Next, the  
355 cell slides were washed twice with 2 x SSC/ 50 % formamide for 15 min at 40 °C and 2 x SSC for 15  
356 min at 40 °C. After 1 hour blocking at RT cells were incubated with anti-biotin antibody (Abcam,  
357 Cambridge, UK. ab53494) and anti-Digoxigenin (Roche, 11333062910) overnight at 4 °C. The  
358 following ChrISP assay was performed as previously described(Chen et al. 2014a; Chen et al. 2014b)  
359 and the ChrISP probes were visualized by using the secondary fluorescent antibodies (goat anti-  
360 rabbit IgG Dylight 594, 35560, Thermo Fisher Scientific; goat anti-mouse IgG Dylight 550, 84540,  
361 Thermo Fisher Scientific) for biotin and digoxigenin, washed again with PBS/ 0.05% Tween20 and  
362 mounted with Vectashield mounting medium with 4',6-diamidino-2-phenylindole (DAPI). As a  
363 technical control, a sample omitting the mouse secondary antibody was included in parallel, called R  
364 plus control, in each experiment. False discovery rate (FDR) was defined as the number of ChrISP  
365 signal at test sample/R plus control at each threshold.

366

#### 367 *Grid confocal microscopy*

368 Cell imaging and generation of optical section in 3D were carried out on Leica DMI 3000B fluorescent  
369 microscopy with OptiGrid device (Grid confocal) using Volocity software (Perkin Elmer, Waltham,  
370 MA). Stacks were taken at 0.3 µm intervals in the Z-axis. In each experiment 150-300 alleles were  
371 counted (Additional file 7: Table S6).

372

#### 373 *Network visualization*

374 All the network figures were generated by Gephi 0.9.1 (Bastian M. 2009) (layout: Force Atlas 2).

375

#### 376 *Bootstrapping network generation*

377 From the reads computed after Nodewalk data processing we generated a set of networks that  
378 represent the family of possible networks that can be originated from the sequencing data by  
379 bootstrapping. To this end, we first selected a number of reads to be included (n=500, 1,500, 5,000)  
380 and randomly selected with replacement a number of reads equal to n from the pool of reads. The  
381 number of bootstrapped networks computed was 1,000. We then calculated 95% CI (Confidence  
382 Interval) of the median of influence index and entropy on these 1,000 weighted network (weights are  
383 number of reads) using bootstrap technique. There is no overlap between CIs and the values of both  
384 measures; both influence index and entropy are significantly different in HCT116 and HCEC network.  
385 (Both median and mean  $p < 2.2e-16$  using Wilcoxon and, Welch's t-test respectively).

386

#### 387 *Dynamic importance index*

388 We used Eigenvalue centrality that quantifies the role of each node in propagating signal through the  
389 whole network to estimate the node influence metric using igraph package (Csardi 2006) of R.

390

## 391 **Results**

### 392 *The Nodewalk principle*

393 The Nodewalk method is built on the initial 3C technique (Dekker et al. 2002), but with several key  
394 modifications (Fig. 1A). To ensure optimal and reproducible results, cells were cross-linked with

395 freshly prepared 1% formaldehyde (FA) solution, instead of formalin (Gondor et al. 2008). The  
396 crosslinked chromatin DNA was digested to near completion (on average 92%) with *Hind* III while  
397 minimizing its star activity and ligated to completion (Additional file 1: Fig. S1A). Following de-  
398 crosslinking and DNA purification, a modified Tn5 transposase introduced random DNA cuts, which  
399 enabled the elimination of PCR duplicates (see below) and ligated the adaptor oligos (Fig. 1B). This  
400 step generated uniform and small fragment sizes of 150-250 bp (Additional file 1: Fig. S1B). The T7  
401 RNA polymerase promoter sequence flanking Illumina P5 sequence was incorporated by tailed PCR  
402 (5-17 cycles depending on the size of the input material). To capture the 3C products, the ligated  
403 genomic DNA was converted to RNA, enabling a linear, 1,000-fold amplification of 3C sequences,  
404 followed by reverse transcription using primers positioned close to the restriction enzyme site of the  
405 region of choice (Fig. 1A). Finally, Illumina sequence adapters were incorporated using the same  
406 primers equipped with P7 sequence against the cDNA that already contained P5 sequences (Fig.  
407 1A,B). This arrangement enabled the direct generation of double-stranded cDNA, suitable for  
408 sequencing. Spurious ligation events were routinely assessed by spiking human chromatin with  
409 similarly cross-linked and digested chromatin derived from *Drosophila* S2 cells. Following high  
410 throughput sequencing, this strategy demonstrated that the proportion of human-*Drosophila*  
411 chimeric reads never exceeded 1%.

412  
413 As initial bait, we chose *MYC* as this region is not only a key to understand the neoplastic process, but  
414 has already been used in 3C (Xiang et al. 2014) and other 3C-derived analyses (Li et al. 2012; Shi et al.  
415 2013; Dryden et al. 2014; Rao et al. 2014). The estimate of the enrichment of sequences specific for  
416 the bait (Fig. 1C, D) was based on that each *Hind* III fragment represents on average one 830,000<sup>th</sup> of  
417 the human genome. As the specifically primed bait cDNA corresponded to 50 +/- 10 % of the entire  
418 sequence population, the strategy to prime the 3C RNA library with dedicated oligos achieved  
419 >400,000-fold enrichment of the bait and its interactors in one single step (Fig. 1D). To remove PCR  
420 duplicates which is essential for quantitative analysis (Schwartzman et al. 2016), we assessed the  
421 number of the cutting sites generated by the transposase, hereafter termed “ligation events or LEs”  
422 for counting each unique interaction, rather than the raw reads in the sequence library (Additional  
423 file 1: Fig. S1C). Comparing two independent replicas, Nodewalk was able to recover ca 45% of all  
424 bait alleles (Fig. 1E) with a reproducibility of interacting sequences highest within the neighboring  
425 TADs (Fig. 1F,G). To validate the *MYC* interactome, we focused on 8 different regions representing  
426 high and low-abundant interactors in *cis* (Fig. 1H, Additional file 2: Table S1, Additional file 3: S2).  
427 Conventional quantitative 3C analysis confirmed only minor biases when compared with the number  
428 of de-duplicated reads (LE) obtained by high throughput sequencing (Fig. 1I). We conclude that the  
429 Nodewalk strategy correctly measured the relative frequencies of chromatin fibre interactions with a  
430 high reproducibility and recovery from 3C DNA aliquots representing only 10,000 cells. As there was  
431 no discernible difference in data output when the same sample was analyzed by either Mi-seq and  
432 Hi-seq (Fig. 1H), we also conclude that the Nodewalk technique is cost-effective.

#### 433 434 *Walking the nodes: A network of enhancers*

435 The inclusion of an *in vitro* transcription step in the Nodewalk protocol represents a unique  
436 advantage in comparison with competing techniques as the RNA template can be reproduced  
437 numerous times from the same initial library, offering the possibility to establish the interactomes of  
438 multiple interactors in a sequential manner (Fig. 2A) even if the initial sample size is small. The  
439 statistically significant interactors were selected using a background algorithm established by  
440 (Williams et al. 2014) (see Methods). The implementation of this principle is shown for the *MYC* locus  
441 (Fig. 2B), with 9 central nodes enriched in enhancer marks (Fig. 2C,D) selected from iterative screens  
442 (Additional file 4: Table S3, Additional file 5: S4). We conclude from these analyses that each of the  
443 selected baits reconnected with the original bait to further document the reproducibility of the  
444 network. Moreover, the network includes frequent inter-chromosomal interactions (Additional file 1:  
445 Fig. S2A) and displays enrichment for enhancer marks (Additional file 1: Fig. S2B) both in *cis* and in  
446 *trans*, suggesting that active domains functioned as preferred interacting partners.

447  
448 To better understand the underlying dynamics, the networks from HCT116 cells and their normal  
449 counterparts, primary colon epithelial cells (HCEC), were stratified according to their k-core values,  
450 which measure the cohesion of the network (Seidman 1983) (Fig. 2D and Additional file 1: Fig. S2C).  
451 To compensate for any bias in network comparisons arising from the fact that *MYC* is triploid in  
452 HCT116 (Langer et al. 2005) and diploid in HCEC cells, we randomly sampled two thirds of the  
453 interactions from the HCT116 network. Although the un-stratified network displayed only minor  
454 differences between the normal and cancerous counterparts, the most connected nodes were  
455 considerably more prominent in colon cancer cells than in normal cells (Additional file 1: Fig. S2C,D).  
456 Examining the chromatin marks associated with higher connectivity, we found that primed or active  
457 enhancers were strongly enriched with increasing k-core values specifically in cancer cells (Additional  
458 file 1: Fig. S2C,D). Although this suggested that active enhancer-specific histone modifications serve  
459 to increase network connectivity, a fraction of the well-connected chromatin hubs present in HCT116  
460 cells interacted also in HCEC cells despite not carrying H3K27ac marks in these cells (Additional file 1:  
461 Fig. S2C-E). Finally, as could be expected, the network nodes displaying the highest connectivity  
462 preferentially localized within the two TADs flanking *MYC* (Fig. 2E, F). Interestingly, *MYC* itself is  
463 located close to the inter-TAD boundary and is able to explore the neighboring two TADs equally well  
464 in both HCEC and HCT116 cells (Fig. 2F). This conclusion is in keeping with the observation that *MYC*  
465 has the highest dynamic importance index within the chromatin interactome for both HCEC and  
466 HCT116 cells (Fig. 2G). The dynamic importance index represents the importance of the node in  
467 keeping the network structure, i.e. removing a node with high index will change the structure of the  
468 network significantly and globally in contrast of some other centrality indexes such as the degree  
469 which are local indexes (Lohmann et al. 2010). Intuitively, the importance of a node does not only  
470 depend on the number of neighbors it has, but also how central its neighbors are.

471  
472 *Virtual enhancer hubs emerge from stochastic enhancer-promoter communications in large cell*  
473 *population*

474 The presence of an enhancer hub organized around an active gene and involving primarily local  
475 sequences distributed in the neighboring TADs is in keeping with numerous published observations  
476 (Patrinos et al. 2004; Gavrillov and Razin 2008; Kieffer-Kwon et al. 2013; Downen et al. 2014; Dryden et  
477 al. 2014; Hughes et al. 2014; Markenscoff-Papadimitriou et al. 2014; Ji et al. 2015) using assays that  
478 rely on large cell populations as input material. To understand the mechanism of enhancer action in  
479 3D and the plasticity of transcriptional regulation in development and disease, we set out to explore  
480 whether or not multiple enhancers simultaneously converged on their target gene to synergize in  
481 transcriptional initiation, or if such an enhancer network represented the sum of stochastic  
482 interactions present in a large cell population. We reasoned that the resolution of this enigma  
483 requires the quantitation of chromatin fibre interaction frequencies in small input material. Figure 3A  
484 outlines the rationale for this strategy with hypothetical networks being successively reduced in  
485 smaller aliquots of input. If such networks represented dynamic and stochastic events the interaction  
486 patterns would be expected to display increased variability between the aliquots as the size ( $n$ ) of a  
487 statistical sample affects the standard error for that sample (schematically illustrated in Fig. 3A).  
488 Because  $n$  is in the denominator of the standard error formula, the standard error decreases as  $n$   
489 increases. The smaller the sample, the more variable the responses will be while having more data  
490 gives less variation (and more precision) in the results (Kenney 1951). Under this scenario, high  
491 biological variability present in very small cell populations would compromise attempts to show  
492 reproducibility between such aliquots. To resolve this issue, we prepared three types of samples:  
493 One set of ten samples was derived from a large pool of crosslinked and ligated chimeric DNA  
494 representing one million cells, each containing 0.88 ng of 3C DNA aliquot corresponding to 176 cells  
495 (See methods and Additional file 1: Fig S3A for additional information). The qualities of the libraries  
496 are documented in Additional file 1: Figures S3B-E. The other set of nine samples was derived from  
497 small cell populations, each corresponding to 177 cells.

498 Finally, the samples representing the smallest input material consisted of twenty-three aliquots each  
499 containing on average 21 alleles (Additional file 1: Fig. S3F), derived from one of the 177-cell samples  
500 (Additional file 6: Table S5). To assess the reliability of the Nodewalk technique, we started out by  
501 examining the technical variation between RNA libraries generated from 0.88 ng of 3C DNA aliquots,  
502 derived from ligated material representing 1 million cells (Fig. 3B). Focusing on interactors in *cis* (Fig.  
503 1G), we observed that the overlap in interactors present in three different aliquots taken from the  
504 same initial RNA library, which was prepared from 0.88 ng of 3C DNA (Fig. 3B), generated a technical  
505 reproducibility of >90 % (Fig. 3C).  
506

507 In order to estimate the biological variability among libraries representing independent 177-cell  
508 samples (Fig. 3B), we compared the reproducibility of chromatin fibre interactions among the 0.88 ng  
509 aliquots to the reproducibility of chromatin fibre interactions among the 177-cell samples, an  
510 approach that was simplified by a low variability in the quantity of input and the quality of 3C DNA  
511 (Fig. 3D, Additional file 1: Fig. S1A, B and Fig. S3) and a high degree of recovery of the bait alleles  
512 (Additional file 1: Fig. S3E). As could be expected (Fig. 3A), >70 % of interactors impinging on the *MYC*  
513 bait were detected in only one library among the libraries of the nine 177-cell samples (Fig. 3E,F). In  
514 contrast, the libraries of the ten 0.88 ng 3C DNA aliquots showed that >85 % of the interactors were  
515 reproduced in two or more libraries. Nonetheless, both types of samples recapitulated the same  
516 proportion of interactor categories (Fig. 3F). Importantly, the overlap between the pooled 0.88 ng  
517 aliquots or the pooled 177-cell samples and the large ensemble of interactome generated from 3C  
518 DNA aliquots corresponding to 10,000 cells exceeded 91%, highlighting that Nodewalk using small  
519 input material reliably recapitulated a subset of the interactors already present in the ensemble  
520 network (Fig. 3G). As predicted in Figure 3A, the overlap between interactomes present in the  
521 libraries that were generated from small input material was only limited (Fig. 3H). We also note that  
522 Nodewalk assays of all nine baits from the two TADs in the 0.88 ng 3C DNA aliquots showed little  
523 evidence for any enhancer hub interacting with *MYC* (Additional file1: Fig. S3F. See below for more  
524 details).  
525

526 Under the assumption that the enhancer-promoter communications are stochastic, a reduction on  
527 cell/allele population sizes should asymptotically reduce the number of enhancers impinging on *MYC*  
528 within each aliquot. To assess this issue, we randomly selected interactors from the large ensemble  
529 network and scaled it down from 50 ng (corresponding to 10,000 cells) to the level represented by  
530 the recovered alleles for the 177 cell aliquots. Figure 3I shows that this approach strongly reduced  
531 the expected number of enhancers impinging on *MYC* in such small aliquots. Importantly, there was  
532 no significant difference between the expected (generated by 1000 iterations of random sampling  
533 from ensemble network) and the actually observed number of enhancers interacting with *MYC* in the  
534 libraries derived from the nine 177 cell samples. Although this number is not readily consistent with a  
535 static enhancer hub, we further reduced the input sample size to 34.8 pg (Fig. 3G) corresponding to  
536 about 21 alleles (Additional file 1: Fig. S3F). For a more robust analysis, only interactors within the  
537 *MYC* TADs, which were found to be reproducible across the ensemble network, were retained. This  
538 strategy revealed that 6 out of 8 different TAD1/2-specific interactors overlapped entirely with the  
539 parental libraries containing a total of 42 TAD1/2-specific interactors, which included non-enhancer  
540 as well as enhancer regions in both cases (Fig. 3J). When assessing the distribution of the above-  
541 mentioned reproducible interactors among the twenty-three different 34.8 pg aliquots we found  
542 that the observed number of different enhancers interacting with *MYC* in each aliquot ranged from 0  
543 to 1, which relatively closely agreed with the permuted number, i.e. between 0 and 3 different  
544 enhancers binding *MYC* in each aliquot (Fig. 3K). Note that as there is no interaction between the  
545 enhancers labeled as “a” and “b” in the heatmap of Figure 3K within the ensemble network (Fig. 3M),  
546 these likely occurred in different cells. Although the number of enhancers impinging on *MYC*  
547 increased somewhat when including all *cis* and *trans* enhancers in the ensemble network, Additional  
548 file 1: Figure S4 shows that there was still no significant difference between expected and observed  
549 number of enhancers impinging on *MYC*. Based on all of these considerations and on the average

550 recovery of the bait being 36.2% (Fig. 3K), we conclude that on average 0.7 enhancer regions per  
551 34.8 ng aliquot interact with on average 7.6 different *MYC* alleles.

552  
553 Against this conclusion, it could be argued that the Nodewalk technique might have approached a  
554 technical limitation for being able to pick up multiple interactions from such small aliquots. However,  
555 not only is the number of total alleles recovered in the 23 aliquots exceeding the recovered alleles  
556 from each aliquot of the 177 cell samples, but the total number of enhancers within TADs impinging  
557 on *MYC* are comparable. Taken together the data strongly implies that the enhancer hubs observed  
558 in the ensemble network is only virtual, which is consistent with previous results (Sandhu et al. 2009;  
559 Gondor et al. 2010; Ay et al. 2015; Olivares-Chauvet et al. 2016). We conclude, moreover, that  
560 although the identity of the involved regions is specific and reproducible in large populations, the  
561 dynamics of the interactions represent stochastic events in small populations.

562  
563 *Potential for interactions versus direct physical interactions and the link to transcriptional activity*  
564 To relate interaction frequencies to the frequency of *MYC* transcriptional bursts, we performed RNA  
565 FISH analyses using single-stranded probes for introns 1 and 2, followed by DNA FISH analysis  
566 (Additional file 1: Fig. S5A,B). Additional file 1: Figure S5C shows that the majority (55.6%) of the *MYC*  
567 alleles was transcriptionally active in HCT116 cells, which compares well with the observation above  
568 that less than 18% of the *MYC* alleles interact with an enhancer any given time. This result also  
569 suggests that the local enhancers do not generally associate with *MYC* once transcription has been  
570 initiated. We cannot currently rule out, however, that enhancers might be in physical proximity with  
571 transcriptionally active *MYC* alleles without necessarily invoking direct physical contacts. To  
572 examine this issue in single cells, we employed the chromatin *in situ* proximity (ChrISP) technique  
573 (Chen et al. 2014a; Chen et al. 2014b), which translates the proximity between two different DNA  
574 FISH signals into a fluorescent signal only when the epitopes of the differentially labeled DNA FISH  
575 probes are <16.2 nm from each other. An 8 kb fragment covering the *MYC* locus and a portion of the  
576 super-enhancer (9 kb; Fig. 4A) that showed very frequent interactions with the *MYC* locus (Fig. 4B)  
577 and is separated from it by 534 kb (Fig. 4A) were labeled with biotin and digoxigenin, respectively,  
578 hybridized to fixed HCT116 cells followed by the visualization of the ChrISP signal (Fig. 4C, Additional  
579 file 7: Table S6). Quantitation of the ChrISP signals uncovered that the frequency of super-enhancer-  
580 *MYC* proximity is about 50-fold higher than the frequency of direct physical interactions between  
581 them as determined by the Nodewalk technique (Fig. 4D). This difference likely reflects that the  
582 ChrISP assay measures the **potential** for interaction (<16.2 nm), whereas the Nodewalk assay detects  
583 only direct physical interactions between interactors, reflecting the length of the formaldehyde  
584 monomere (0.59 nm). This result is in agreement with our main conclusion that overt physical  
585 interaction between *MYC* and its enhancers is dynamic and stochastic (Fig. 4E) although it also  
586 implies that the opportunities for such interactions is manifold higher than observed with the  
587 Nodewalk technique.

## 588 589 **Discussion**

590  
591 We have described here the Nodewalk innovation, which uniquely have optimized high resolution  
592 with high sensitivity, to assess how variations in 3D chromatin states relate to the transcriptional  
593 process in small input materials. In agreement with several other studies (Patrinos et al. 2004;  
594 Gavrillov and Razin 2008; Berlivet et al. 2013; Kieffer-Kwon et al. 2013; Downen et al. 2014; Kim et al.  
595 2014; Liu et al. 2014; Markenscoff-Papadimitriou et al. 2014; Xiang et al. 2014; Ing-Simmons et al.  
596 2015), the chromatin interactome identified from the 50 ng 3C DNA aliquots contains frequent  
597 interactions among enhancers that increase the apparent cohesion of the chromatin network. This  
598 feature is pronounced especially in cancer cells that contain numerous enhancer regions within  
599 the *MYC* TADs. We also show here, however, that this network is only virtual and that the *MYC* gene  
600 in reality interacts with an array of distal enhancers distributed in the flanking TADs in a stochastic  
601 and hence a largely mutually exclusive manner. This conclusion was possible to make only because of

602 the unique combination of high sensitivity and resolution offered by the Nodewalk technique. By  
603 extrapolation, there is thus little evidence for active enhancer hubs simultaneously cooperating to  
604 transcriptionally activate *MYC* in single cells. While this conclusion certainly does not rule out the  
605 simultaneous presence of multiple enhancer-gene units that aggregate to form transcription  
606 factories (Deng et al. 2013), it has the advantage of providing *MYC* with a smorgasbord of distal  
607 enhancers. Whether these elements act in synergy or independent from any potential promoter-  
608 proximal enhancer function remains to be clarified (Mautner et al. 1995). Irrespective of this  
609 consideration, the scenario with numerous distal enhancers conceivably serves to render *MYC*  
610 expression and hence cancer cells more adaptive to fluctuating environments experienced during the  
611 neoplastic process (Mautner et al. 1995). The opposite interpretation, invoking the possibility that  
612 the enhancers continuously interact to boost *MYC* transcription would require static chromatin fibre  
613 interactions, which is not consistent with the dynamic juxtapositions between the CRC enhancer and  
614 *MYC*.

615  
616 To reach these conclusions, we optimized the Nodewalk technique to yield a sensitivity of at least 21  
617 alleles, corresponding to 7 cells, and yet keeping a high resolution of interacting chromatin  
618 fragments. However, by pushing the boundaries for such a sensitivity, we faced a conundrum: How  
619 to discriminate biological variability in chromatin fibre interactomes from technical variation among  
620 chromatin networks generated from unique, small cell populations? We used three strategies to deal  
621 with this issue. First, we have shown that the technical variation of the Nodewalk analysis of small  
622 aliquots from the same linearly amplified RNA library (i.e. representing the same initial chimeric DNA  
623 library) is very low (<12%). Second, we observed extensive overlap in the identity of the interactors  
624 between the pool of twenty-three 34.8pg 3C DNA aliquots (corresponding to 21 alleles) or the nine  
625 177-cell samples and the ensemble library generated from two 50 ng 3C DNA aliquots (derived from  
626 one million cells), further demonstrating the reproducibility of the assay in small input material.  
627 Third, by binning the interactome data generated from small samples in successively larger windows,  
628 the overall patterns of the ensemble network could be reproduced to demonstrate the stochastic but  
629 preferential patterns of interactions between *MYC* and its enhancers (Additional file 1: Fig. S6).  
630 Moreover, a comparison between observed and expected data generated by permutation analyses  
631 uncovered that interactions between *MYC* and its enhancers display stochastic features in small cell  
632 populations. While it could be argued that limitations in the ligation step would preclude  
633 identification of multiple enhancers interacting with *MYC* in small samples, such as the 34.8 pg  
634 aliquots, we note that the number of enhancers impinging on *MYC* does not increase even when  
635 pooling the recovery of all 23 of the 34.8 pg aliquots to yield a total of 174 alleles. Taken together,  
636 we argue that the Nodewalk technique represent a significant improvement over competing  
637 techniques to reliably discriminate between real and virtual chromatin networks.

638  
639 Our data also addresses whether it is the enhancer or the gene driving the interaction patterns.  
640 Given that the interactions between the TADs are generally infrequent and that *MYC* taps equally  
641 well into the two neighboring TADs both in HCT116 cells and HCECs, we submit that the mobility of  
642 the inter-TAD boundary containing *MYC* drives *MYC*-enhancer communications. This interpretation is  
643 underscored by the ChrISP analysis showing that a significant proportion of the *MYC* alleles are in  
644 relatively close physical proximity to the colorectal super-enhancer within TAD1, suggesting the  
645 existence of a more compacted TAD conformation in a subset of the cells to increase the potential  
646 for interactions. Thus, 43% of all TAD1-specific interactors distribute over a large 1 Mbp region  
647 represented by TAD1 (Fig. 2F), despite that 37% of all alleles at the same time display close physical  
648 proximity between a small portion of the super-enhancer and *MYC* (Fig. 4D) From this it follows that  
649 a large fraction of the *MYC* alleles is proximal to the entire TAD while being physically juxtaposed to  
650 the colorectal super-enhancer. Such a process might place enhancer hubs in relative physical  
651 proximity to each other although the frequency of direct physical interactions between them is likely  
652 dynamic and hence not detectable by Nodewalk in small cell populations. With *MYC* strategically  
653 placed between the two flanking TADs, we further propose that such a position enhances the ability

654 of *MYC* to stochastically engage enhancers from either TAD (Fig. 4E). This reasoning is in keeping with  
655 the observation that *MYC* has the highest dynamic importance index in comparison with enhancers  
656 positioned within either of the TADs in the virtual network. We conclude that while *MYC* generally  
657 interacts with only one enhancer at a time in very small sample inputs, colon cancer cells have  
658 organized a chromatin environment in which enhancers might be in relative proximity to each other  
659 in a TAD-specific manner to facilitate *MYC*-enhancer communications. The plasticity underlying this  
660 process provides the cancer cell with a selective advantage as multiple signaling pathways converge  
661 on different sets of *MYC* enhancers in cancer cells (Hnisz et al. 2015). Combined with the flexibility  
662 incurred by being positioned at an inter-TAD boundary, such an accessibility of enhancers might  
663 ensure *MYC* activation to drive excessive cell proliferation irrespective of a changing  
664 microenvironment that the cancer cell might experience during the neoplastic process.  
665

666 To sum up, by applying the Nodewalk technique to very small cell populations, we have been able to  
667 document that the chromatin networks within the two TADs impinging on *MYC* have evolved to  
668 facilitate redundant mechanisms of *MYC* activation in cancer cells. The major advantage of this  
669 decentralized network topology is that there might be no "single point of failure" within the  
670 network to ensure the potential for continuous activation of *MYC* to increase the fitness of cancer  
671 cells by promoting their adaptability to changing microenvironments. Such a network structure might  
672 necessitate the identification of therapeutic strategies that focus on the inter-TAD boundary rather  
673 than the super-enhancers to attenuate *MYC* expression in cancer patients. On a more general note,  
674 the extreme sensitivity and versatility of the Nodewalk technique has opened up numerous,  
675 previously inaccessible applications, such as the deciphering of cellular heterogeneity in chromatin  
676 structures within solid and liquid tumor biopsies and circulating tumor cells, where subpopulations of  
677 cells are identified by marker antibodies. Such an approach might also be essential to determine the  
678 precise order of events underlying stochastic transcriptional activation driving cancer evolution.  
679

#### 681 **Acknowledgements**

682 The authors would like to acknowledge support from Science for Life Laboratory, the National  
683 Genomics Infrastructure, NGI, and Uppmax for providing assistance in massive parallel sequencing  
684 and computational infrastructure as well as the extensive data sets from ENCODE. This work was  
685 supported by the Swedish Cancer Foundation (CAN2016/576 (AG); CAN2016/616 (JPS), VR-NT (2013-  
686 4511 (RO)), VR-M (2015-02312 (PS); 2014-3683 (RO); 2016-03108 (AG)), Karolinska Institutet (AG,  
687 RO), Åke Wiberg Stiftelse (M16-0090; AG)), Swedish Pediatric Cancer Foundation (2015-0129; AG)),  
688 and the KA Wallenberg Foundation (Clinical Epigenetics; RO).  
689

#### 690 **Availability of data and materials**

691 All the sequence data have been deposited to the NCBI Gene Expression Omnibus  
692 (<https://www.ncbi.nlm.nih.gov/geo/>) under the accession number of GSE76049.  
693  
694  
695

696 **References**

- 697
- 698 Ay F, Vu TH, Zeitz MJ, Varoquaux N, Carette JE, Vert JP, Hoffman AR, Noble WS. 2015. Identifying multi-locus  
699 chromatin contacts in human cells using tethered multiple 3C. *BMC genomics* **16**: 121.
- 700 Bastian M. HS, Jacomy M. . 2009. Gephi: an open source software for exploring and manipulating networks.  
701 *International AAAI Conference on Weblogs and Social Media*.
- 702 Berlivet S, Paquette D, Dumouchel A, Langlais D, Dostie J, Kmita M. 2013. Clustering of tissue-specific sub-TADs  
703 accompanies the regulation of HoxA genes in developing limbs. *PLoS Genet* **9**: e1004018.
- 704 Chen X, Shi C, Yammine S, Gondor A, Ronnlund D, Fernandez-Woodbridge A, Sumida N, Widengren J, Ohlsson  
705 R. 2014a. Chromatin in situ proximity (ChRISP): Single-cell analysis of chromatin proximities at a high resolution.  
706 *Biotechniques* **56**: 117-124.
- 707 Chen X, Yammine S, Shi C, Tark-Dame M, Gondor A, Ohlsson R. 2014b. The visualization of large organized  
708 chromatin domains enriched in the H3K9me2 mark within a single chromosome in a single cell. *Epigenetics* **9**:  
709 1439-1445.
- 710 Csardi G, Nepusz, T.,. 2006. The igraph software package for complex network research. *InterJournal, Complex*  
711 *Systems*: 1695.
- 712 Dekker J, Rippe K, Dekker M, Kleckner N. 2002. Capturing chromosome conformation. *Science* **295**: 1306-1311.
- 713 Deng B, Melnik S, Cook PR. 2013. Transcription factories, chromatin loops, and the dysregulation of gene  
714 expression in malignancy. *Seminars in cancer biology* **23**: 65-71.
- 715 Dixon JR, Selvaraj S, Yue F, Kim A, Li Y, Shen Y, Hu M, Liu JS, Ren B. 2012. Topological domains in mammalian  
716 genomes identified by analysis of chromatin interactions. *Nature* **485**: 376-380.
- 717 Downen JM, Fan ZP, Hnisz D, Ren G, Abraham BJ, Zhang LN, Weintraub AS, Schuijers J, Lee TI, Zhao K et al. 2014.  
718 Control of cell identity genes occurs in insulated neighborhoods in mammalian chromosomes. *Cell* **159**: 374-  
719 387.
- 720 Dryden NH, Broome LR, Dudbridge F, Johnson N, Orr N, Schoenfelder S, Nagano T, Andrews S, Wingett S,  
721 Kozarewa I et al. 2014. Unbiased analysis of potential targets of breast cancer susceptibility loci by Capture Hi-  
722 C. *Genome Res* **24**: 1854-1868.
- 723 Du Z, Zheng H, Huang B, Ma R, Wu J, Zhang X, He J, Xiang Y, Wang Q, Li Y et al. 2017. Allelic reprogramming of  
724 3D chromatin architecture during early mammalian development. *Nature* **547**: 232-235.
- 725 Fullwood MJ, Liu MH, Pan YF, Liu J, Xu H, Mohamed YB, Orlov YL, Velkov S, Ho A, Mei PH et al. 2009. An  
726 oestrogen-receptor-alpha-bound human chromatin interactome. *Nature* **462**: 58-64.
- 727 Gavrillov AA, Razin SV. 2008. Spatial configuration of the chicken alpha-globin gene domain: immature and  
728 active chromatin hubs. *Nucleic Acids Res* **36**: 4629-4640.
- 729 Gondor A, Rougier C, Ohlsson R. 2008. High-resolution circular chromosome conformation capture assay. *Nat*  
730 *Protoc* **3**: 303-313.
- 731 Gondor A, Woodbridge AF, Shi C, Aurell E, Imreh M, Ohlsson R. 2010. Window into the complexities of  
732 chromosome interactomes. *Cold Spring Harb Symp Quant Biol* **75**: 493-500.
- 733 Hager GL, McNally JG, Misteli T. 2009. Transcription dynamics. *Molecular cell* **35**: 741-753.
- 734 Hay D, Hughes JR, Babbs C, Davies JO, Graham BJ, Hanssen LL, Kassouf MT, Oudelaar AM, Sharpe JA, Suci MC  
735 et al. 2016. Genetic dissection of the alpha-globin super-enhancer in vivo. *Nature genetics* **48**: 895-903.
- 736 Hnisz D, Abraham BJ, Lee TI, Lau A, Saint-Andre V, Sigova AA, Hoke HA, Young RA. 2013. Super-enhancers in the  
737 control of cell identity and disease. *Cell* **155**: 934-947.
- 738 Hnisz D, Schuijers J, Lin CY, Weintraub AS, Abraham BJ, Lee TI, Bradner JE, Young RA. 2015. Convergence of  
739 developmental and oncogenic signaling pathways at transcriptional super-enhancers. *Mol Cell* **58**: 362-370.
- 740 Hughes JR, Roberts N, McGowan S, Hay D, Giannoulatou E, Lynch M, De Gobbi M, Taylor S, Gibbons R, Higgs  
741 DR. 2014. Analysis of hundreds of cis-regulatory landscapes at high resolution in a single, high-throughput  
742 experiment. *Nature genetics* **46**: 205-212.
- 743 Ing-Simmons E, Seitan VC, Faure AJ, Flicek P, Carroll T, Dekker J, Fisher AG, Lenhard B, Merckenschlager M. 2015.  
744 Spatial enhancer clustering and regulation of enhancer-proximal genes by cohesin. *Genome Res* **25**: 504-513.
- 745 Ji X, Dadon DB, Powell BE, Fan ZP, Borges-Rivera D, Shachar S, Weintraub AS, Hnisz D, Pegoraro G, Lee TI et al.  
746 2015. 3D Chromosome Regulatory Landscape of Human Pluripotent Cells. *Cell stem cell*  
747 doi:10.1016/j.stem.2015.11.007.
- 748 Kenney JF. 1951. *Mathematics of Statistics*, . Chapman & Hall LTD.
- 749 Kieffer-Kwon KR, Tang Z, Mathe E, Qian J, Sung MH, Li G, Resch W, Baek S, Pruett N, Grontved L et al. 2013.  
750 Interactome maps of mouse gene regulatory domains reveal basic principles of transcriptional regulation. *Cell*  
751 **155**: 1507-1520.



- 752 Kim T, Cui R, Jeon YJ, Lee JH, Lee JH, Sim H, Park JK, Fadda P, Tili E, Nakanishi H et al. 2014. Long-range  
753 interaction and correlation between MYC enhancer and oncogenic long noncoding RNA CARLo-5. *Proc Natl*  
754 *Acad Sci U S A* **111**: 4173-4178.
- 755 Langer S, Geigl JB, Ehnle S, Gangnus R, Speicher MR. 2005. Live cell catapulting and recultivation does not  
756 change the karyotype of HCT116 tumor cells. *Cancer Genet Cytogenet* **161**: 174-177.
- 757 Li G, Ruan X, Auerbach RK, Sandhu KS, Zheng M, Wang P, Poh HM, Goh Y, Lim J, Zhang J et al. 2012. Extensive  
758 promoter-centered chromatin interactions provide a topological basis for transcription regulation. *Cell* **148**: 84-  
759 98.
- 760 Lieberman-Aiden E, van Berkum NL, Williams L, Imakaev M, Ragozy T, Telling A, Amit I, Lajoie BR, Sabo PJ,  
761 Dorschner MO et al. 2009. Comprehensive mapping of long-range interactions reveals folding principles of the  
762 human genome. *Science* **326**: 289-293.
- 763 Liu Z, Legant WR, Chen BC, Li L, Grimm JB, Lavis LD, Betzig E, Tjian R. 2014. 3D imaging of Sox2 enhancer  
764 clusters in embryonic stem cells. *Elife* **3**: e04236.
- 765 Lohmann G, Margulies DS, Horstmann A, Pleger B, Lepsien J, Goldhahn D, Schloegl H, Stumvoll M, Villringer A,  
766 Turner R. 2010. Eigenvector centrality mapping for analyzing connectivity patterns in fMRI data of the human  
767 brain. *PLoS one* **5**: e10232.
- 768 Loven J, Hoke HA, Lin CY, Lau A, Orlando DA, Vakoc CR, Bradner JE, Lee TI, Young RA. 2013. Selective inhibition  
769 of tumor oncogenes by disruption of super-enhancers. *Cell* **153**: 320-334.
- 770 Markenscoff-Papadimitriou E, Allen WE, Colquitt BM, Goh T, Murphy KK, Monahan K, Mosley CP, Ahituv N,  
771 Lomvardas S. 2014. Enhancer interaction networks as a means for singular olfactory receptor expression. *Cell*  
772 **159**: 543-557.
- 773 Mautner J, Joos S, Werner T, Eick D, Bornkamm GW, Polack A. 1995. Identification of two enhancer elements  
774 downstream of the human c-myc gene. *Nucleic Acids Res* **23**: 72-80.
- 775 Nagano T, Lubling Y, Stevens TJ, Schoenfelder S, Yaffe E, Dean W, Laue ED, Tanay A, Fraser P. 2013. Single-cell  
776 Hi-C reveals cell-to-cell variability in chromosome structure. *Nature* **502**: 59-64.
- 777 Naumova N, Smith EM, Zhan Y, Dekker J. 2012. Analysis of long-range chromatin interactions using  
778 Chromosome Conformation Capture. *Methods* **58**: 192-203.
- 779 Olivares-Chauvet P, Mukamel Z, Lifshitz A, Schwartzman O, Elkayam NO, Lubling Y, Deikus G, Sebra RP, Tanay A.  
780 2016. Capturing pairwise and multi-way chromosomal conformations using chromosomal walks. *Nature* **540**:  
781 296-300.
- 782 Patrinos GP, de Krom M, de Boer E, Langeveld A, Imam AM, Strouboulis J, de Laat W, Grosveld FG. 2004.  
783 Multiple interactions between regulatory regions are required to stabilize an active chromatin hub. *Genes Dev*  
784 **18**: 1495-1509.
- 785 Picelli S, Bjorklund AK, Reinius B, Sagasser S, Winberg G, Sandberg R. 2014. Tn5 transposase and tagmentation  
786 procedures for massively scaled sequencing projects. *Genome research* **24**: 2033-2040.
- 787 Rao SS, Huntley MH, Durand NC, Stamenova EK, Bochkov ID, Robinson JT, Sanborn AL, Machol I, Omer AD,  
788 Lander ES et al. 2014. A 3D map of the human genome at kilobase resolution reveals principles of chromatin  
789 looping. *Cell* **159**: 1665-1680.
- 790 Sanchez A, Golding I. 2013. Genetic determinants and cellular constraints in noisy gene expression. *Science*  
791 **342**: 1188-1193.
- 792 Sandhu KS, Shi C, Sjolinder M, Zhao Z, Gondor A, Liu L, Tiwari VK, Guibert S, Emilsson L, Imreh MP et al. 2009.  
793 Nonallelic transvection of multiple imprinted loci is organized by the H19 imprinting control region during  
794 germline development. *Genes Dev* **23**: 2598-2603.
- 795 Schwartzman O, Mukamel Z, Oded-Elkayam N, Olivares-Chauvet P, Lubling Y, Landan G, Izraeli S, Tanay A. 2016.  
796 UMI-4C for quantitative and targeted chromosomal contact profiling. *Nature methods* **13**: 685-691.
- 797 Seidman SB. 1983. Network structure and minimum degree. *Social Networks* **5**: 269-287.
- 798 Shi J, Whyte WA, Zepeda-Mendoza CJ, Milazzo JP, Shen C, Roe JS, Minder JL, Mercan F, Wang E, Eckersley-  
799 Maslin MA et al. 2013. Role of SWI/SNF in acute leukemia maintenance and enhancer-mediated Myc  
800 regulation. *Genes & development* **27**: 2648-2662.
- 801 Stevens TJ, Lando D, Basu S, Atkinson LP, Cao Y, Lee SF, Leeb M, Wohlfahrt KJ, Boucher W, O'Shaughnessy-  
802 Kirwan A et al. 2017. 3D structures of individual mammalian genomes studied by single-cell Hi-C. *Nature* **544**:  
803 59-64.
- 804 Williams RL, Jr., Starmer J, Mugford JW, Calabrese JM, Mieczkowski P, Yee D, Magnuson T. 2014. fourSig: a  
805 method for determining chromosomal interactions in 4C-Seq data. *Nucleic Acids Res* **42**: e68.
- 806 Xiang JF, Yin QF, Chen T, Zhang Y, Zhang XO, Wu Z, Zhang S, Wang HB, Ge J, Lu X et al. 2014. Human colorectal  
807 cancer-specific CCAT1-L lncRNA regulates long-range chromatin interactions at the MYC locus. *Cell Res* **24**: 513-  
808 531.

809 Zhao H, Sifakis EG, Sumida N, Millan-Arino L, Scholz BA, Svensson JP, Chen X, Ronnegren AL, Mallet de Lima CD,  
810 Varnoosfaderani FS et al. 2015. PARP1- and CTCF-Mediated Interactions between Active and Repressed  
811 Chromatin at the Lamina Promote Oscillating Transcription. *Mol Cell* **59**: 984-997.  
812 Zhao Z, Tavoosidana G, Sjolinder M, Gondor A, Mariano P, Wang S, Kanduri C, Lezcano M, Sandhu KS, Singh U  
813 et al. 2006. Circular chromosome conformation capture (4C) uncovers extensive networks of epigenetically  
814 regulated intra- and interchromosomal interactions. *Nat Genet* **38**: 1341-1347.  
815 Zhou X, Maricque B, Xie M, Li D, Sundaram V, Martin EA, Koebbe BC, Nielsen C, Hirst M, Farnham P et al. 2011.  
816 The Human Epigenome Browser at Washington University. *Nature methods* **8**: 989-990.  
817  
818

819 **Legends to the figures**

820

821 **Figure 1: The Nodewalk principle and associated quality controls.**

822

823 A) Schematic representation of Nodewalk procedure. Region of the interest (Bait: blue) and interacting locus  
824 (Interactor: green) are represented by line with restriction site (*Hind* III). Horizontal arrows indicate primers. B)  
825 Schematic representation of oligo DNAs and primers designed for the Nodewalk protocol. C) Principle to  
826 generate cDNAs from 3C RNA. The size of the bait becomes uniform after the enrichment of the bait-interactor  
827 junction. D) Assay to evaluate the fold enrichment of specifically primed 3C cDNAs. The DNA band indicated by  
828 an arrow represents the enriched bait fragment. Panel E) shows the recovery of interactors between two  
829 independent replicates while F) shows the amount of reproducible interactors between two independent  
830 replicates stratified as indicated in the panel. G) Accumulated reproducibility between two independent  
831 experiments. H) Map of *MYC* locus with arrows indicating the position of interactors identified by using *MYC* as  
832 initial bait. I) Comparison between Q-PCR analysis of 3C DNA products and the resulting normalized reads from  
833 the very same sample. Data are represented as mean + SEM from two independent replicates. Dots indicate  
834 the actual values. The numbers indicate the positions of interactors identified from the Nodewalk analysis  
835 shown in H).

836

837 **Figure 2. The generation of Nodewalk networks and their link to enhancers.**

838

839 A) Schematic visualization of sequential “Nodewalking”. The iterative nature of the principle is represented by  
840 a network of detected loci (circles) and their interactions (lines). B) The actual network generated from the  
841 *MYC* locus in HCT116 cells, using this strategy. C) The position of each new bait highlighted in B). All baits were  
842 from *MYC* and the TADs flanking *MYC* on chromosome 8 except for bait nr 10 that originated from  
843 chromosome 5. Vertical lines indicate the interactors and their ligation events (LE) impinging on *MYC*. D) The  
844 network structure from HCT116 cells stratified by its k-core values. The red and green nodes identify regions  
845 overlapping with H3K27ac and H3K4me1 peaks, respectively. The size of each node reflects the number of the  
846 interactors. E) Distribution of interactors generated from enhancer baits from within TAD 1 and 2, respectively.  
847 F) The interactions of enhancer hubs largely follow the TAD boundaries - with the exception for the *MYC* bait  
848 (nr 5), which equally interacts with both flanking TADs in both HCEC and HCT116 cells. G) Dynamic importance  
849 index (D.I. Index) analysis of the nine enhancer baits in HCEC and HCT116 cells.

850

851 **Figure 3: Discrimination between virtual and real enhancer hubs.**

852

853 A) The principle of analysis of stochastic chromatin networks displayed in libraries with lower amount of input.  
854 The frequency of the distribution of interactors in the panel showing the 0.88 ng aliquots are predicted to  
855 closely follow a normalized distribution profile representative of the initial 3C sample derived from one million  
856 cells. Under the assumption that the network represents stochastic interactions, the biological variability is  
857 expected to be higher in the 177 cell sample than in the 0.88 ng sample with the highest variability represented  
858 by the 34.8 pg/21 alleles. B) Sampling of technical and biological replicas. “Tech.” represents technical whereas  
859 “Biol.” represents biological replicas. C) Venn diagram showing the overlap in interactors in *cis* between three  
860 different technical replicas. D) Chromatin networks detected by the *MYC* bait on 10 aliquots of 0.88 ng 3C DNA  
861 aliquots or 9 different aliquots of 177 cells. The size of each node reflects its connectivity. E) Bar diagram  
862 showing the relationship between number of interactors (in *cis*) versus the counts the number of the replicates  
863 showing the specific interaction. The bait was omitted from this analysis. F) The stratification of interactors  
864 based on the presence or absence of enhancer marks in HCT116 cells. G) Venn diagram demonstrating the  
865 overlap between pooled low cell input samples and the 50 ng “ensemble” library. H) Heatmap of enhancer-  
866 *MYC* interactions in the flanking TADs within the libraries of the 0.88 ng aliquots. I) The observed frequencies of  
867 enhancers impinging on the *MYC* bait compared to the expected frequencies, generated by random resampling  
868 of interactors in TADs with enhancer marks impinging on the *MYC* bait scaled from 50 ng 3C DNA input to 177  
869 cells. J) Overlap between pooled libraries from 34.8 pg input and pooled libraries from 177 cells within TADs. K)  
870 The overall recovery of *MYC* bait alleles in 23 x 34.8 pg aliquots, each of which corresponds to 21 alleles input  
871 material is shown on top of a heatmap of the *MYC* network. The interactors were organized in *cis* keeping their  
872 relative position on the physical map. “a” and “b” indicates the location of the interactors represented in L). L)  
873 The virtual enhancer hubs observed within the TAD1/2 in the ensemble libraries. The right-most network image  
874 identifies lack of physical and direct interaction between nodes “a” and “b”. M) The observed frequencies of

875 enhancers interacting with *MYC* bait compared to the expected frequencies scaled down from 50 ng 3C DNA  
876 input to 21 alleles.

877

878 **Figure 4: The relationship between direct interactions and potential for interactions.**

879

880 Schematic depiction of the overall (A) and detailed (B) position of the probes used to assess the frequency of  
881 proximity between *MYC* and its colorectal super-enhancer in confocal images of single HCT116 cells (C). Bar = 4  
882  $\mu\text{m}$ . Negative controls included omission of secondary antibody and a site not interacting with the *MYC* bait  
883 and 1.53 Mbp distal to *MYC* (A). D) The comparison between quantitated frequencies of *MYC*-enhancer  
884 proximities with the proportion of the corresponding ratio calculated from the Nodewalk data based on 177  
885 cells or 50 ng. E) Schematic representation of enhancer hubs showing that their likely partner is intra-TAD-  
886 specific. The enhancer hubs are postulated to have an increased relative potential for interaction due to  
887 compaction of TADs 1 and 2, respectively, in a subset of HCT116 cells with *MYC* hypothesized to be switching  
888 between the TADs in mutually exclusive manners.

889

890

891 **Legends to the supplemental figures:**

892

893

894 **Figure S1:**

895

896 A) Digestion and ligation efficiencies analyzed by agarose gel electrophoresis. B) Nextera tagmentation  
897 fragments 3C DNA to uniform sizes. C) Comparison between number of raw reads and the de-duplicated reads  
898 (LE).

899

900

901 **Figure S2: Enrichment of enhancer chromatin hubs identified by Nodewalk.**

902

903 A) Map of inter-chromosomal interactome generated from 10 different baits with each chromosome color-  
904 coded as indicated in the image. B) Enrichment analysis of chromatin marks at the network nodes. P-values  
905 were estimated from 1,000 permutations (see the methods). C) The re-sampled network structure from  
906 HCT116 and HCEC stratified by their k-core values. The nodes of the red identify regions overlapping H3K27ac  
907 peaks. The size of each node reflects the number of the interactors. D) The comparison of the proportion of  
908 either H3k27ac peaks (left) or super-enhancer (right) between HCEC, HCT116 and re-sampled HCT116 stratified  
909 with k-core values. E) The enrichment of cancer-specific H3K27ac mark on HCEC interactors.

910

911

912 **Figure S3: The modified Nodewalk protocol adapted for lower amount of the cells.**

913

914 A) Flow scheme. B) Visualization of Hind III digestion and 3C ligation using adapted protocol with 10,000  
915 cells. C) Digestion efficiency of chromatin DNA (at the *MYC* bait) of 9 different aliquots of input material  
916 corresponding to 177 cells. D) The quantification of input DNA from 0.88 ng aliquots of 3C DNA or 177 cells. E)  
917 Recovery of *MYC* alleles in chromatin network generated by Nodewalk analyses of individual aliquots as  
918 indicated. F) The quantification of input from 34.8 pg of 3C DNA. G) The observed frequencies of enhancers  
919 impinging on the *MYC* bait compared to the expected frequencies, generated by random resampling of  
920 interactors in TADs scaled from 50 ng 3C DNA input to 0.88 ng.

921

922

923 **Figure S4:**

924

925 The observed frequencies of enhancers interacting with *MYC* bait compared to the expected frequencies scaled  
926 down from 50 ng 3C DNA input to 21 alleles. Values were calculated from the interactors in whole genome

927

928

929

930

931 **Figure S5: RNA FISH analysis of *MYC* transcription.**

932

933 A) The position of the single-stranded intron probes used for RNA FISH analysis. B) Sequential  
934 confocal RNA/DNA FISH images exemplifying the identification of active and inactive *MYC* alleles,  
935 respectively. Bar= 4  $\mu$ m. C) Summary of the RNA FISH signals (green=intron 1; red=intron 2) to depict  
936 ongoing *MYC* transcription in HCT116 cells. The various proportions of the red and green signals in  
937 the chart likely reflect partial transcripts and/or partial RNA processing.

938

939

940 **Figure S6. The stochastic character of the *MYC* network.**

941

942 Comparison of interaction profiles in the TADs flanking *MYC* with interaction profiles binned into  
943 larger windows resulting from Nodewalk analyses using 50 ng 3C DNA/10,000 cells input (green),  
944 0.88 ng 3C DNA aliquots (red) and 177 cell aliquots (blue).

Figure 1

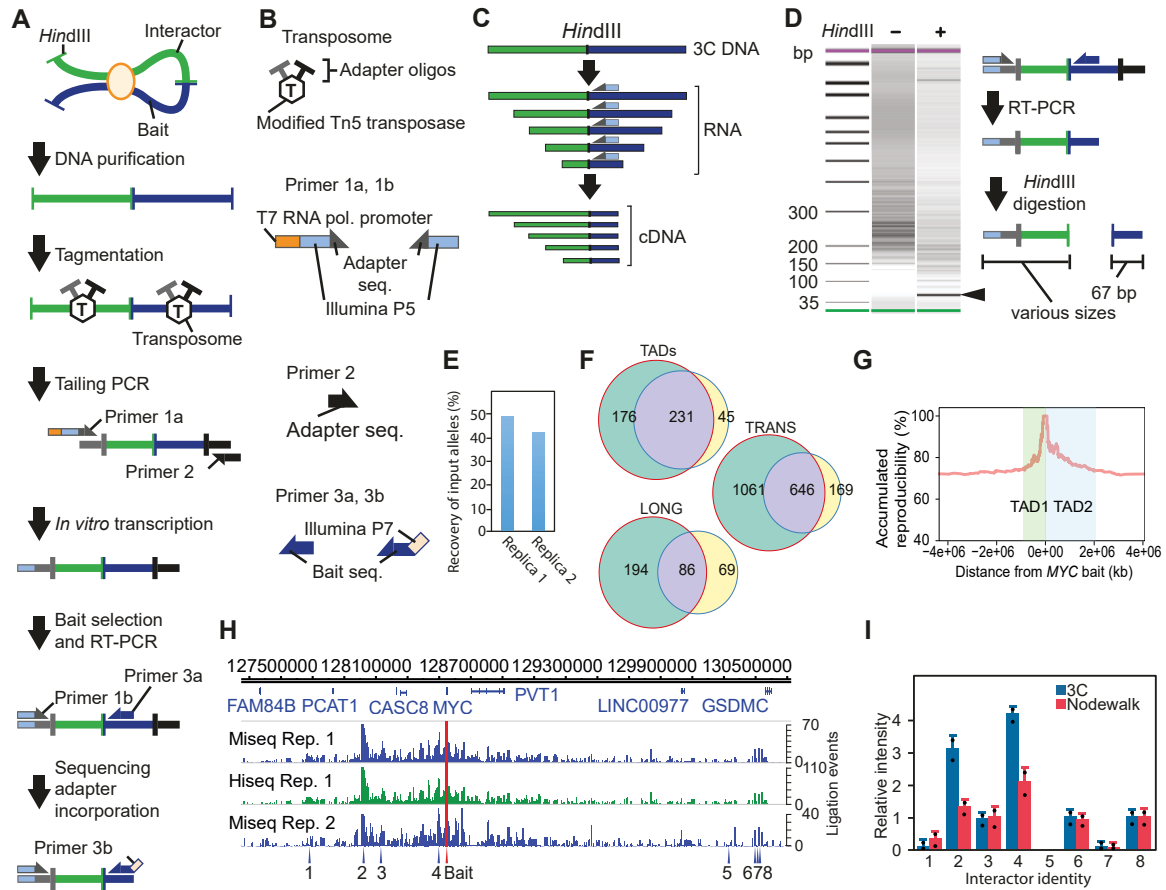

Figure 2

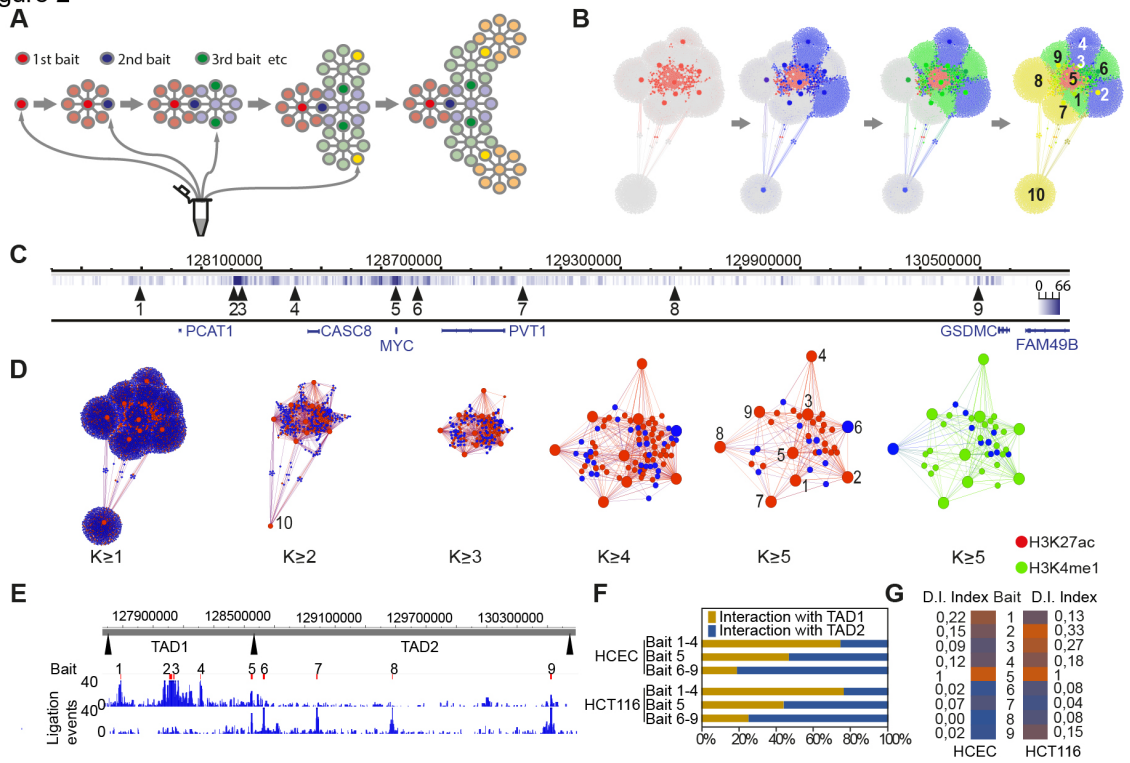

Figure 3

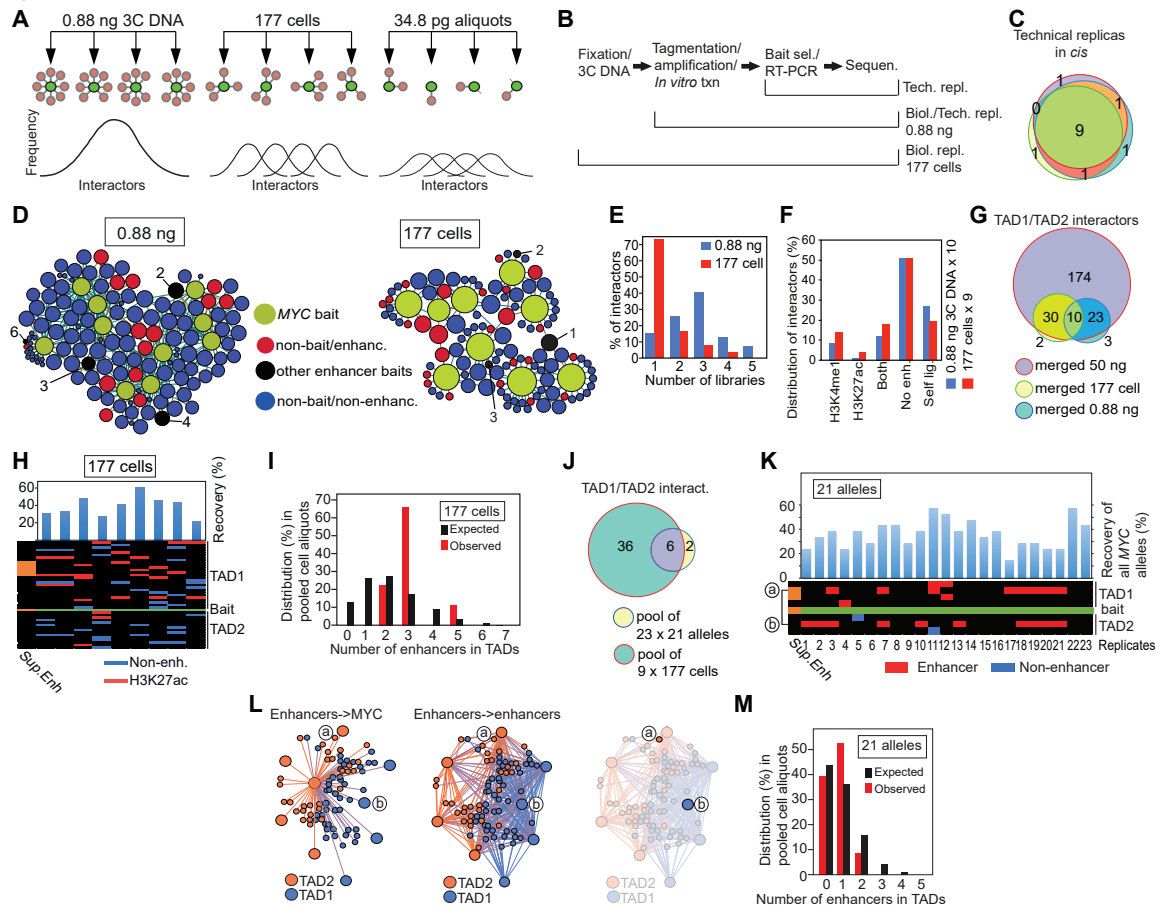



Figure 4

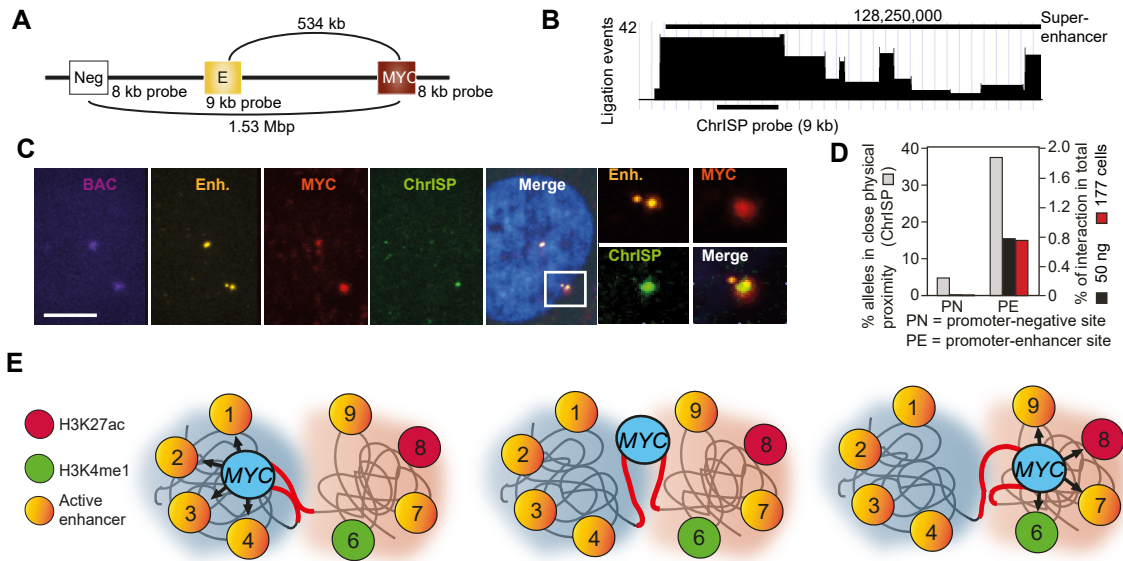

Legends to the supplemental figures:

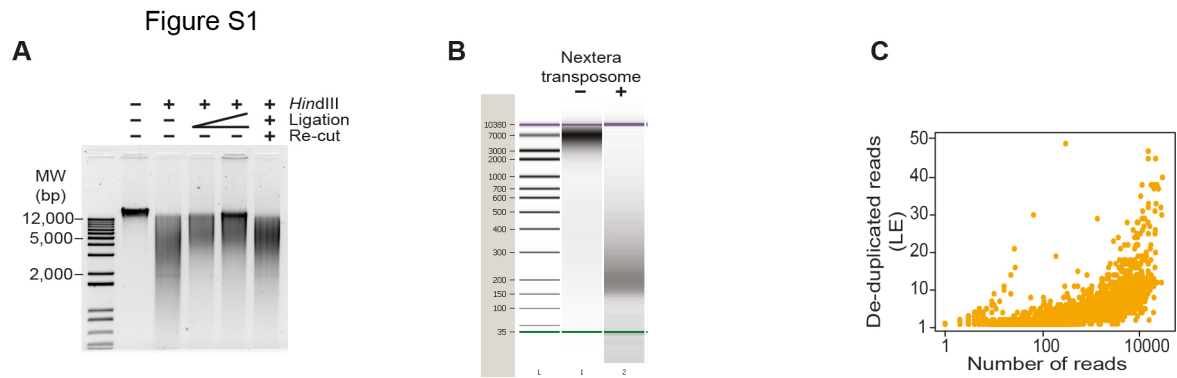

**Figure S1:**

A) Digestion and ligation efficiencies analyzed by agarose gel electrophoresis. B) Nextera tagmentation fragments 3C DNA to uniform sizes. C) Comparison between number of raw reads and the de-duplicated reads (LE).

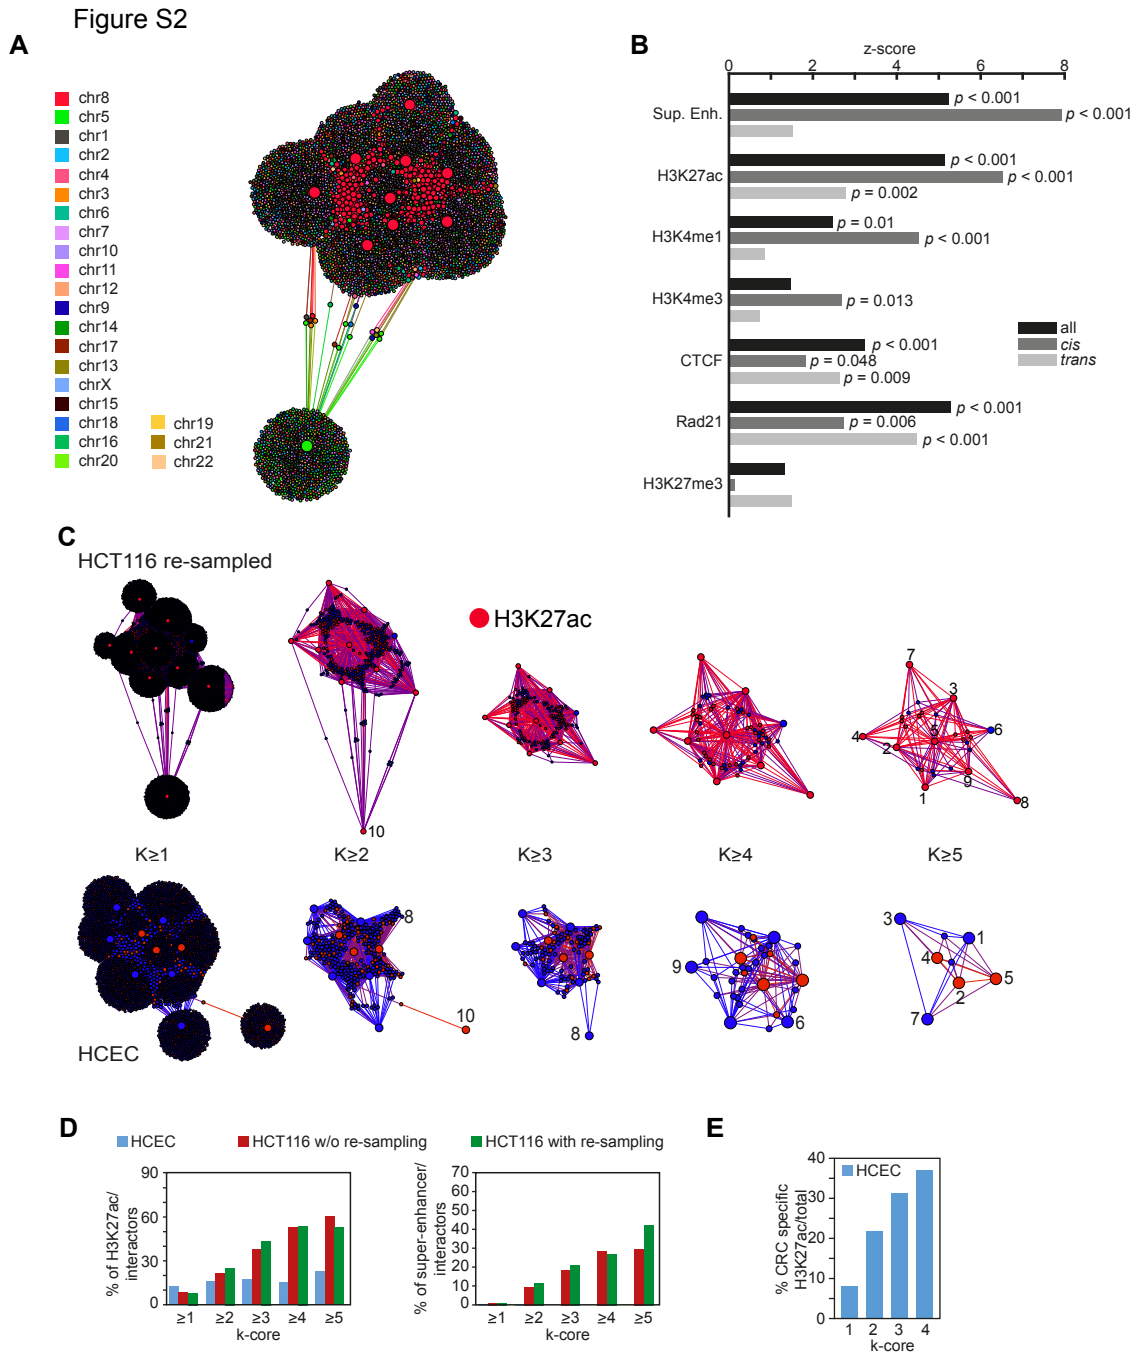

**Figure S2: Enrichment of enhancer chromatin hubs identified by Nodewalk.**

A) Map of inter-chromosomal interactome generated from 10 different baits with each chromosome color-coded as indicated in the image. B) Enrichment analysis of chromatin marks at the network nodes. P-values were estimated from 1,000 permutations (see the methods). C) The re-sampled network structure from HCT116 and HCEC stratified by their k-core values. The nodes of the red identify regions overlapping H3K27ac peaks. The size of each node reflects the number of the interactors. D) The comparison of the proportion of either H3K27ac peaks (left) or super-enhancer (right) between HCEC, HCT116 and re-sampled HCT116 stratified with k-core values. E) The enrichment of cancer-specific H3K27ac mark on HCEC interactors.

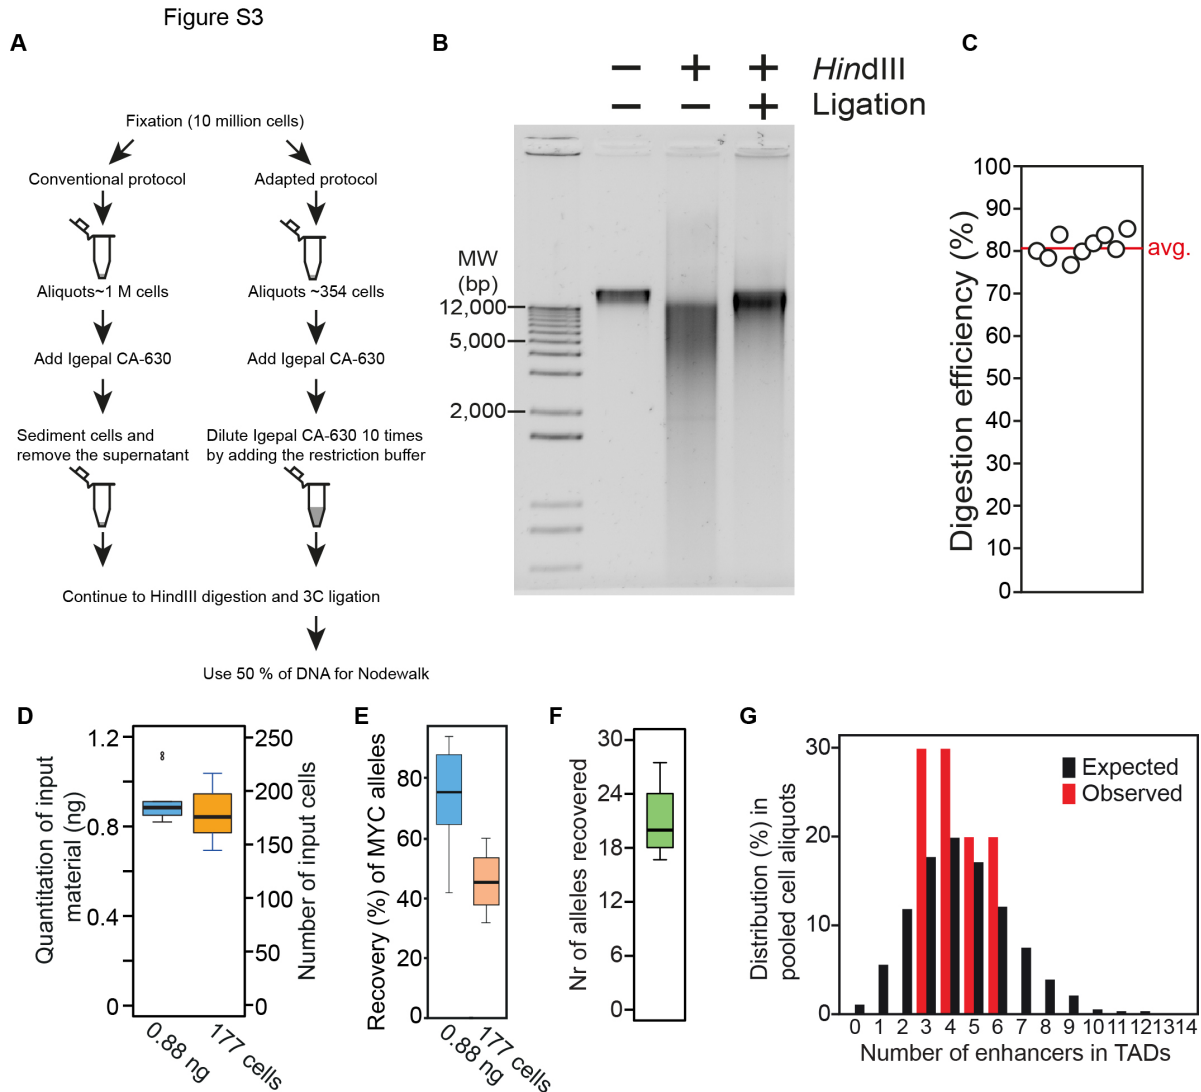

**Figure S3: The modified Nodewalk protocol adapted for lower amount of the cells.**

A) Flow scheme. B) Visualization of Hind III digestion and 3C ligation using adapted protocol with 10,000 cells. C) Digestion efficiency of chromatin DNA (at the MYC bait) of 9 different aliquots of input material corresponding to 177 cells. D) The quantification of input DNA from 0.88 ng aliquots of 3C DNA or 177 cells. E) Recovery of MYC alleles in chromatin network generated by Nodewalk analyses of individual aliquots as indicated. F) The quantification of input from 34.8 pg of 3C DNA. G) The observed frequencies of enhancers impinging on the MYC bait compared to the expected frequencies, generated by random resampling of interactors in TADs scaled from 50 ng 3C DNA input to 0.88 ng.

Figure S4

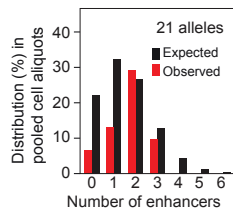

Figure S4:

The observed frequencies of enhancers interacting with MYC bait compared to the expected frequencies scaled down from 50 ng 3C DNA input to 21 alleles. Values were calculated from the interactors in whole genome.

Figure S5

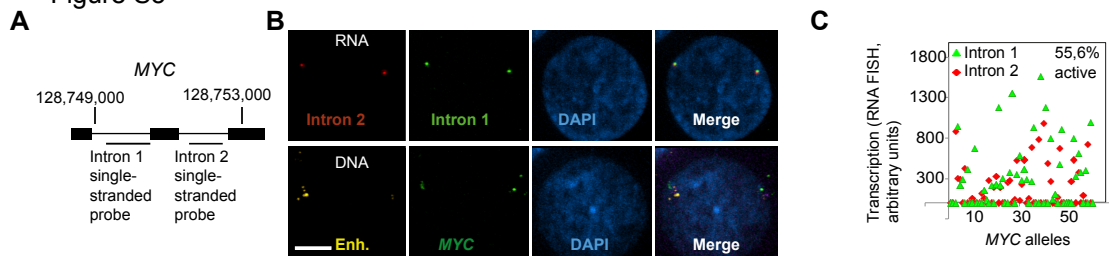

Figure S5: RNA FISH analysis of MYC transcription.

A) The position of the single-stranded intron probes used for RNA FISH analysis. B) Sequential confocal RNA/DNA FISH images exemplifying the identification of active and inactive MYC alleles, respectively. Bar= 4  $\mu$ m. C) Summary of the RNA FISH signals (green=intron 1; red=intron 2) to depict ongoing MYC transcription in HCT116 cells. The various proportions of the red and green signals in the chart likely reflect partial transcripts and/or partial RNA processing.

Figure S6

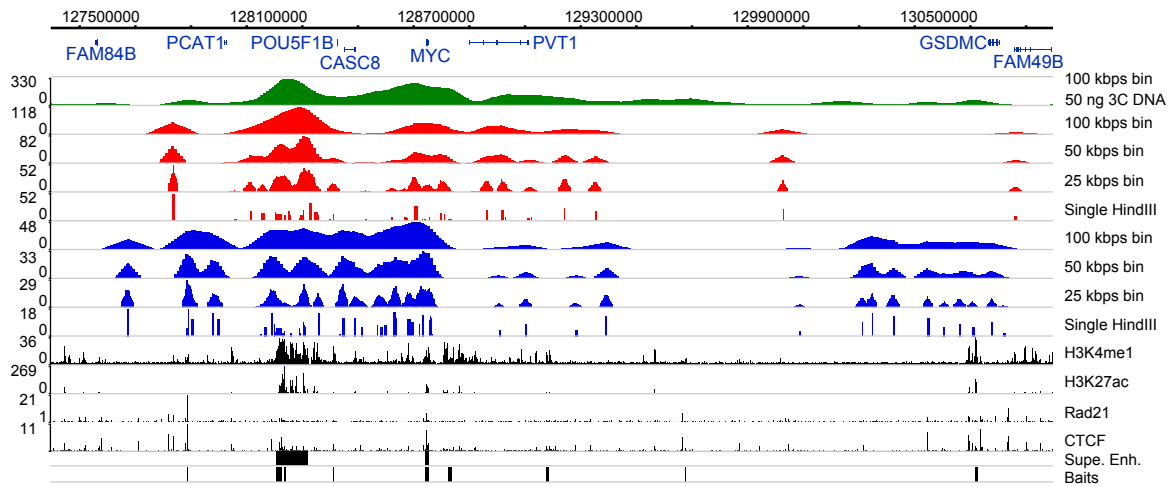

**Figure S6. The stochastic character of the MYC network.**

Comparison of interaction profiles in the TADs flanking MYC with interaction profiles binned into larger windows resulting from Nodewalk analyses using 50 ng 3C DNA/10,000 cells input (green), 0.88 ng 3C DNA aliquots (red) and 177 cell aliquots (blue).
